# Supplementary material
Source: publisher figshare collection journal article supplement (https://rs.figshare.com/ndownloader/files/12535844)
Supplement: Supplementary file 1 [file 12535844]

**Royal Society Open Science**

Supporting information

Identification of 16,25-*O*-diacetyl-cucurbitane F and 25-*O*-acetyl-23,24-dihydrocucurbitacin F as novel anti-cancer chemicals

Wenxue Wang‡, Haoran Yang‡, Ying Li, Zhongfei Zheng, Yongjun Liu, Haiyang Wang, Yanling Mu*, Qingqiang Yao*

| **Contents** | **Page** |
| --- | --- |
| **Fig. S1** HRESIMS of hemslepenside J (**1**) | **1** |
| **Fig. S2** IR spectrum (KBr) of hemslepenside J (**1**) | **2** |
| **Fig. S3** 1H NMR spectrum (DMSO-*d6*, 600 MHz) of hemslepenside J (**1**) | **3** |
| **Fig. S4** 13C NMR spectrum (DMSO-*d6*, 150 MHz) of hemslepenside J (**1**) | **4** |
| **Fig. S5** DEPT 90° spectrum **(**DMSO-*d6***)** of hemslepenside J (**1**) | **5** |
| **Fig. S6** DEPT 135° spectrum **(**DMSO-*d6***)** of hemslepenside J (**1**) | **6** |
| **Fig. S7** HSQC spectrum (DMSO-*d6*) of hemslepenside J (**1**) | **7** |
| **Fig. S8** HMBC spectrum (DMSO-*d6*) of hemslepenside J (**1**) | **8** |
| **Fig. S9** 1H-1H COSY spectrum (DMSO-*d6*) of hemslepenside J (**1**) | **9** |
| **Fig. S10** NOESY spectrum (DMSO-*d6*) of hemslepenside J (**1**) | **10** |
| **Fig. S11** HRESIMS of hemslepenside K (**2**) | **11** |
| **Fig. S12** IR spectrum (KBr) of hemslepenside K (**2**) | **12** |
| **Fig. S13** 1H NMR spectrum (MeOH-*d4*, 600 MHz) of hemslepenside K (**2**) | **13** |
| **Fig. S14** 13C NMR spectrum (MeOH-*d4*, 150 MHz) of hemslepenside K (**2**) | **14** |
| **Fig. S15** DEPT 90° spectrum **(**MeOH-*d4***)** of hemslepenside K (**2**) | **15** |
| **Fig. S16** DEPT 135° spectrum **(**MeOH-*d4***)** of hemslepenside K (**2**) | **16** |
| **Fig. S17** HSQC spectrum (MeOH-*d4*) of hemslepenside K (**2**) | **17** |
| **Fig. S18** HMBC spectrum (MeOH-*d4*) of hemslepenside K (**2**) | **18** |
| **Fig. S19** 1H-1H COSY spectrum (MeOH-*d4*) of hemslepenside K (**2**) | **19** |
| **Fig. S20** NOESY spectrum (MeOH-*d4*) of hemslepenside K (**2**) | **20** |
| **Fig. S21** HRESIMS of hemslepenside L (**3**) | **21** |
| **Fig. S22** IR spectrum (KBr) of hemslepenside L (**3**) | **22** |
| **Fig. S23** 1H NMR spectrum (MeOH-*d4*, 600 MHz) of hemslepenside L (**3**) | **23** |
| **Fig. S24** 13C NMR spectrum (MeOH-*d4*, 150 MHz) of hemslepenside L (**3**) | **24** |
| **Fig. S25** DEPT 90° spectrum **(**MeOH-*d4***)** of hemslepenside L (**3**) | **25** |
| **Fig. S26** DEPT 135° spectrum **(**MeOH-*d4***)** of hemslepenside L (**3**) | **26** |
| **Fig. S27** HSQC spectrum (MeOH-*d4*) of hemslepenside L (**3**) | **27** |
| **Fig. S28** HMBC spectrum (MeOH-*d4*) of hemslepenside L (**3**) | **28** |
| **Fig. S29** 1H-1H COSY spectrum (MeOH-*d4*) of hemslepenside L (**3**) | **29** |
| **Fig. S30** NOESY spectrum (MeOH-*d4*) of hemslepenside L (**3**) | **30** |
| **Fig. S31** HRESIMS of hemslepenside M (**4**) | **31** |
| **Fig. S32** IR spectrum (KBr) of hemslepenside M (**4**) | **32** |
| **Fig. S33** 1H NMR spectrum (MeOH-*d4*, 600 MHz) of hemslepenside M (**4**) | **33** |
| **Fig. S34** 13C NMR spectrum (MeOH-*d4*, 150 MHz) of hemslepenside M (**4**) | **34** |
| **Fig. S35** DEPT 90° spectrum **(**MeOH-*d4***)** of hemslepenside M (**4**) | **35** |
| **Fig. S36** DEPT 135° spectrum **(**MeOH-*d4***)** of hemslepenside M (**4**) | **36** |
| **Fig. S37** HSQC spectrum (MeOH-*d4*) of hemslepenside M (**4**) | **37** |
| **Fig. S38** HMBC spectrum (MeOH-*d4*) of hemslepenside M (**4**) | **38** |
| **Fig. S39** 1H-1H COSY spectrum (MeOH-*d4*) of hemslepenside M (**4**) | **39** |
| **Fig. S40** NOESY spectrum (MeOH-*d4*) of hemslepenside M (**4**) | **40** |
| **Fig. S41** HRESIMS of hemslepenside N (**5**) | **41** |
| **Fig. S42** IR spectrum (KBr) of hemslepenside N (**5**) | **42** |
| **Fig. S43** 1H NMR spectrum (MeOH-*d4*, 600 MHz) of hemslepenside N (**5**) | **43** |
| **Fig. S44** 13C NMR spectrum (MeOH-*d4*, 150 MHz) of hemslepenside N (**5**) | **44** |
| **Fig. S45** DEPT 90° spectrum **(**MeOH-*d4***)** of hemslepenside N (**5**) | **45** |
| **Fig. S46** DEPT 135° spectrum **(**MeOH-*d4***)** of hemslepenside N (**5**) | **46** |
| **Fig. S47** HSQC spectrum (MeOH-*d4*) of hemslepenside N (**5**) | **47** |
| **Fig. S48** HMBC spectrum (MeOH-*d4*) of hemslepenside N (**5**) | **48** |
| **Fig. S49** 1H-1H COSY spectrum (MeOH-*d4*) of hemslepenside N (**5**) | **49** |
| **Fig. S50** NOESY spectrum (MeOH-*d4*) of hemslepenside N (**5**) | **50** |
| **Fig. S51** HRESIMS of hemslepenside O (**6**) | **51** |
| **Fig. S52** IR spectrum (KBr) of hemslepenside O (**6**) | **52** |
| **Fig. S53** 1H NMR spectrum (MeOH-*d4*, 600 MHz) of hemslepenside O (**6**) | **53** |
| **Fig. S54** 13C NMR spectrum (MeOH-*d4*, 150 MHz) of hemslepenside O (**6**) | **54** |
| **Fig. S55** DEPT 90° spectrum **(**MeOH-*d4***)** of hemslepenside O (**6**) | **55** |
| **Fig. S56** DEPT 135° spectrum **(**MeOH-*d4***)** of hemslepenside O (**6**) | **56** |
| **Fig. S57** HSQC spectrum (MeOH-*d4*) of hemslepenside O (**6**) | **57** |
| **Fig. S58** HMBC spectrum (MeOH-*d4*) of hemslepenside O (**6**) | **58** |
| **Fig. S59** 1H-1H COSY spectrum (MeOH-*d4*) of hemslepenside O (**6**) | **59** |
| **Fig. S60** NOESY spectrum (MeOH-*d4*) of hemslepenside O (**6**) | **60** |
| **Fig. S61** HRESIMS of hemslepenside P (**7**) | **61** |
| **Fig. S62** IR spectrum (KBr) of hemslepenside P (**7**) | **62** |
| **Fig. S63** 1H NMR spectrum (MeOH-*d4*, 600 MHz) of hemslepenside P (**7**) | **63** |
| **Fig. S64** 13C NMR spectrum (MeOH-*d4*, 150 MHz) of hemslepenside P (**7**) | **64** |
| **Fig. S65** DEPT 90° spectrum **(**MeOH-*d4***)** of hemslepenside P (**7**) | **65** |
| **Fig. S66** DEPT 135° spectrum **(**MeOH-*d4***)** of hemslepenside P (**7**) | **66** |
| **Fig. S67** HSQC spectrum (MeOH-*d4*) of hemslepenside P (**7**) | **67** |
| **Fig. S68** HMBC spectrum (MeOH-*d4*) of hemslepenside P (**7**) | **68** |
| **Fig. S69** 1H-1H COSY spectrum (MeOH-*d4*) of hemslepenside P (**7**) | **69** |
| **Fig. S70** NOESY spectrum (MeOH-*d4*) of hemslepenside P (**7**) | **70** |
| **Fig. S71** HPLC spectrogram of the composition sugar’ derivatives | **71-75** |
| **Table S1** The IC50 values of compounds **1**-**9** against HT29 cell line | **76** |
| **Table S2** Cell cycle data of compound **8** | **76** |
| **Table S3** Cell cycle data of compound **9** | **76** |
| **Table S4** Cell apoptosis data of compound **8** | **76** |
| **Table S5** Cell apoptosis data of compound **9** | **77** |

**Fig. S1** HRESIMS of hemslepenside J (**1**)


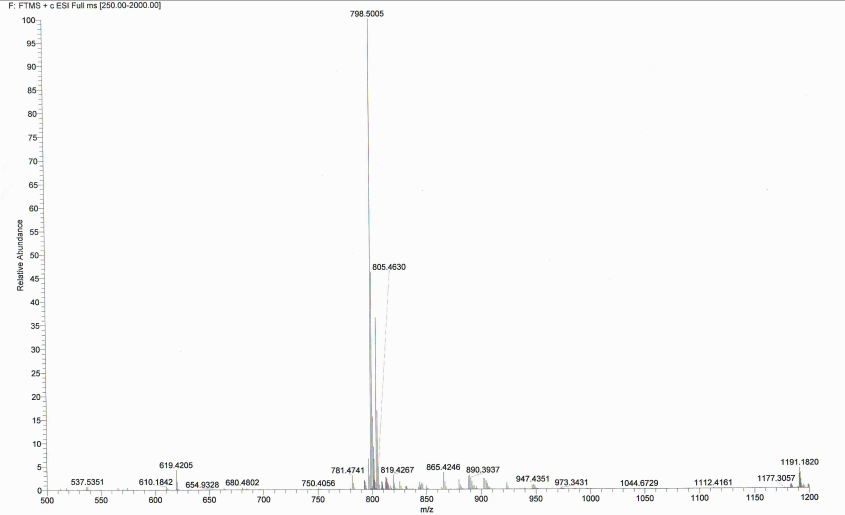


**Fig. S2** IR spectrum (KBr) of hemslepenside J (**1**)

**Fig. S3** 1H NMR spectrum (DMSO-*d6*, 600 MHz) of hemslepenside J (**1**)


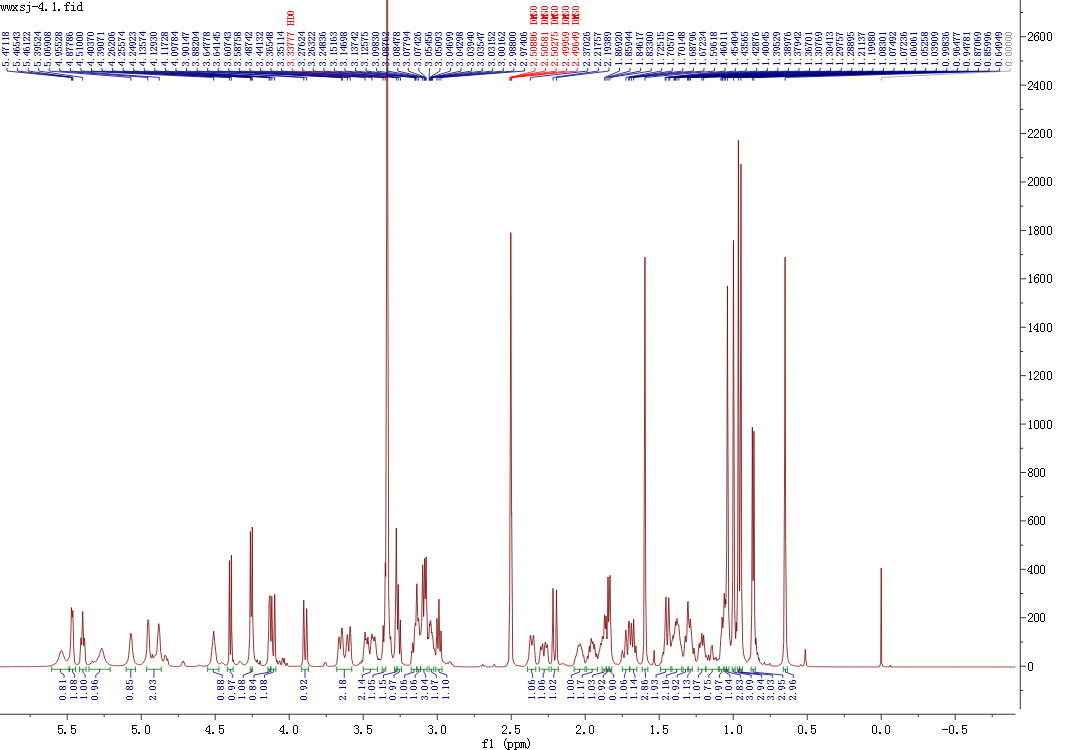


**Fig. S4** 13C NMR spectrum (DMSO-*d6*, 150 MHz) of hemslepenside J (**1**)


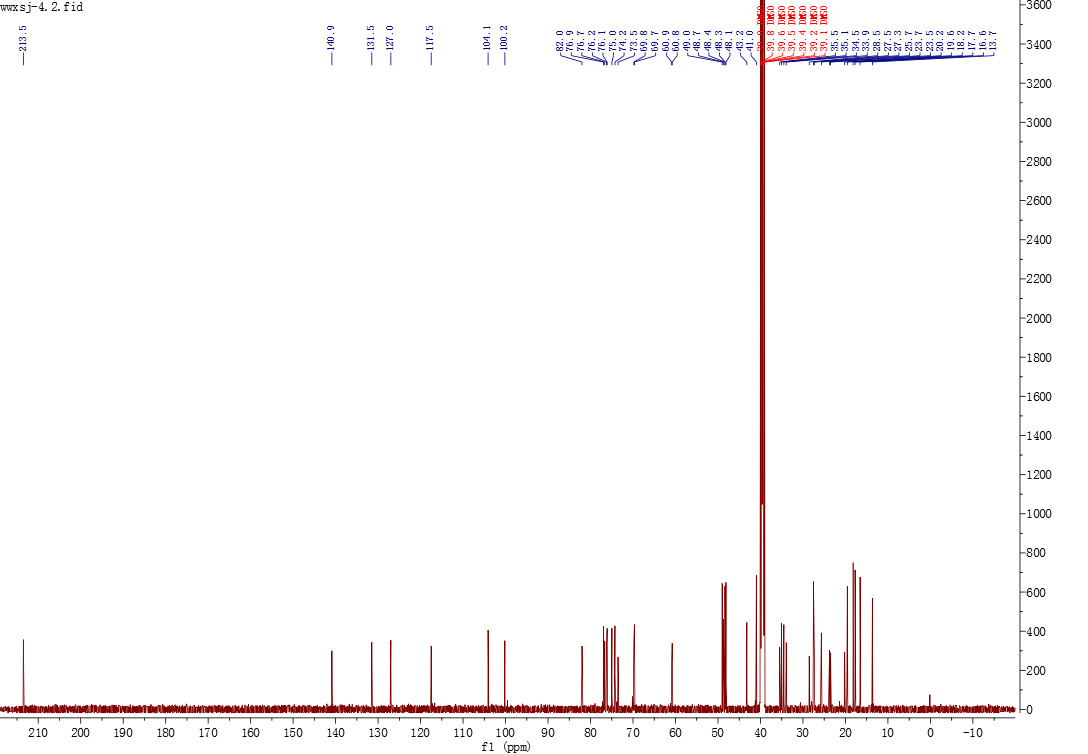


**Fig. S5** DEPT 90° spectrum **(**DMSO-*d6***)** of hemslepenside J (**1**)


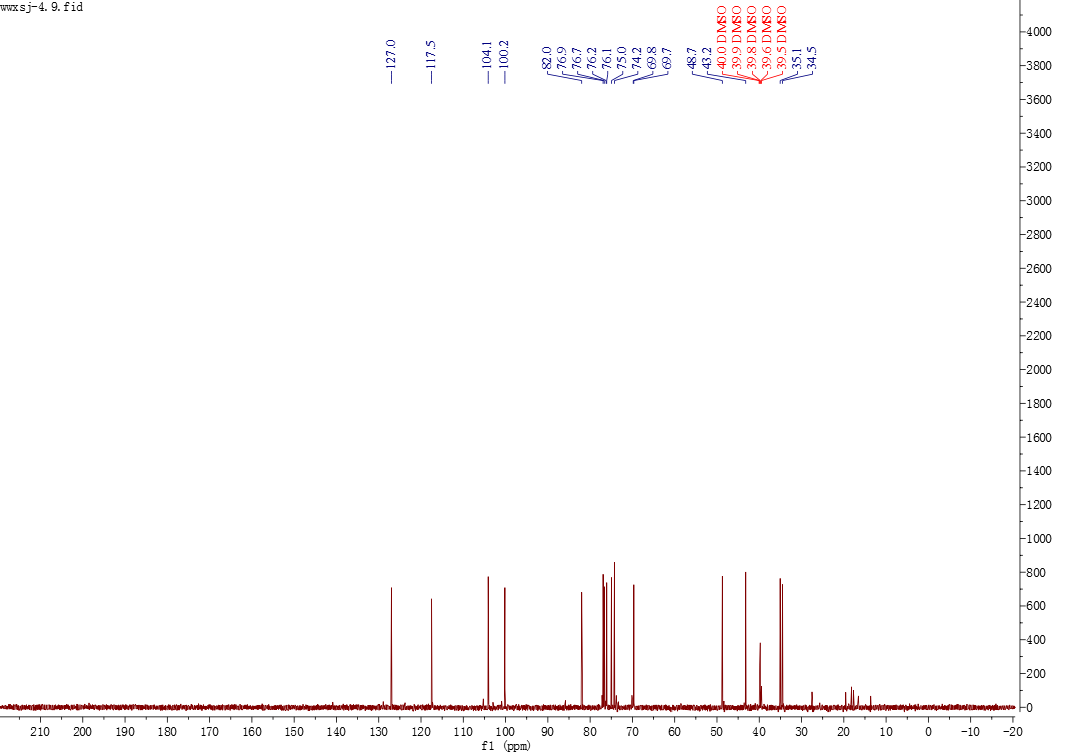


**Fig. S6** DEPT 135° spectrum **(**DMSO-*d6***)** of hemslepenside J (**1**)


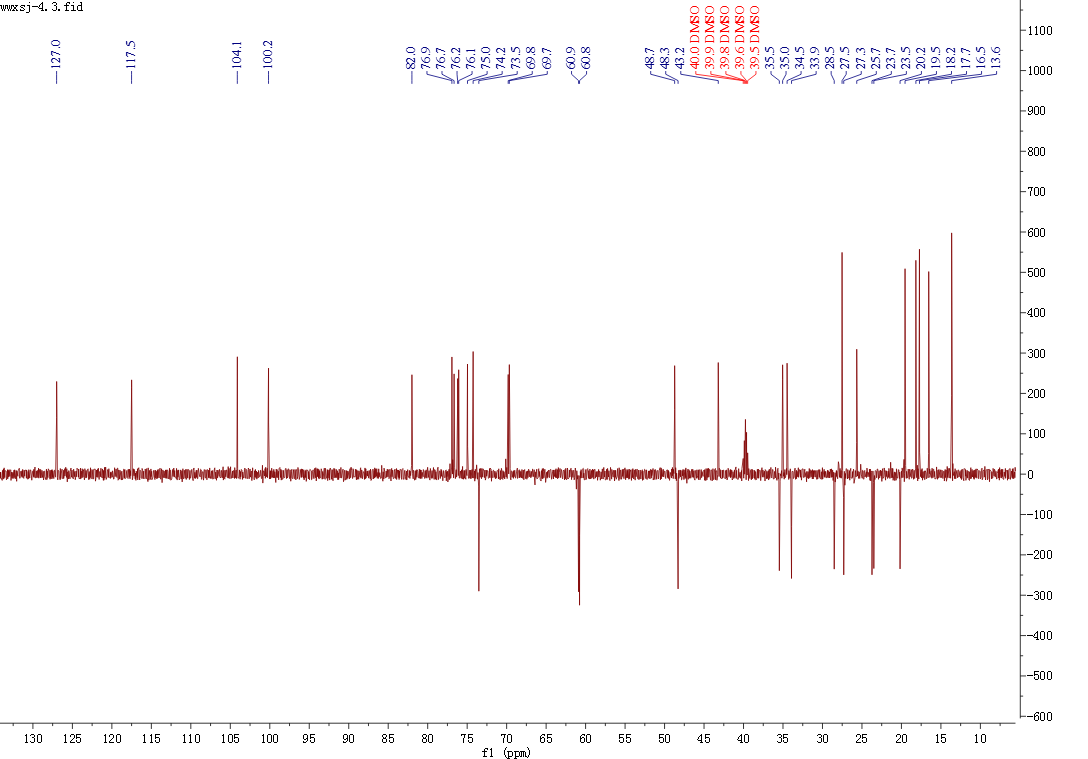


**Fig. S7** HSQC spectrum (DMSO-*d6*) of hemslepenside J (**1**)


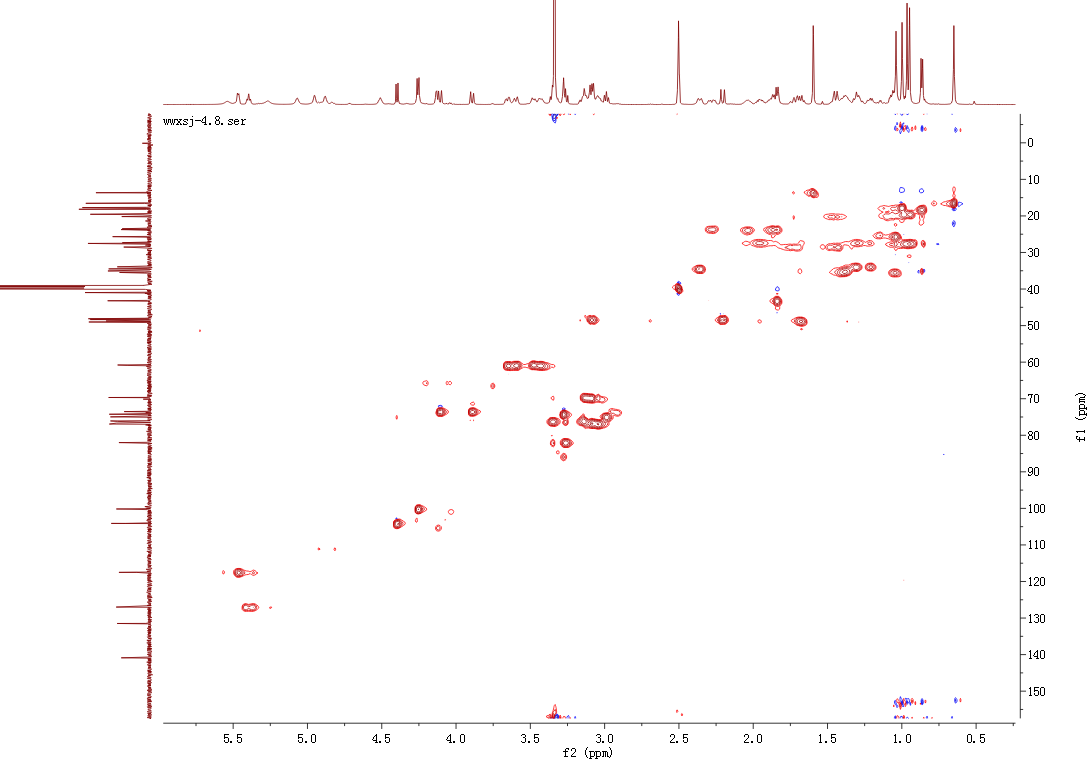


**Fig. S8** HMBC spectrum (DMSO-*d6*) of hemslepenside J (**1**)


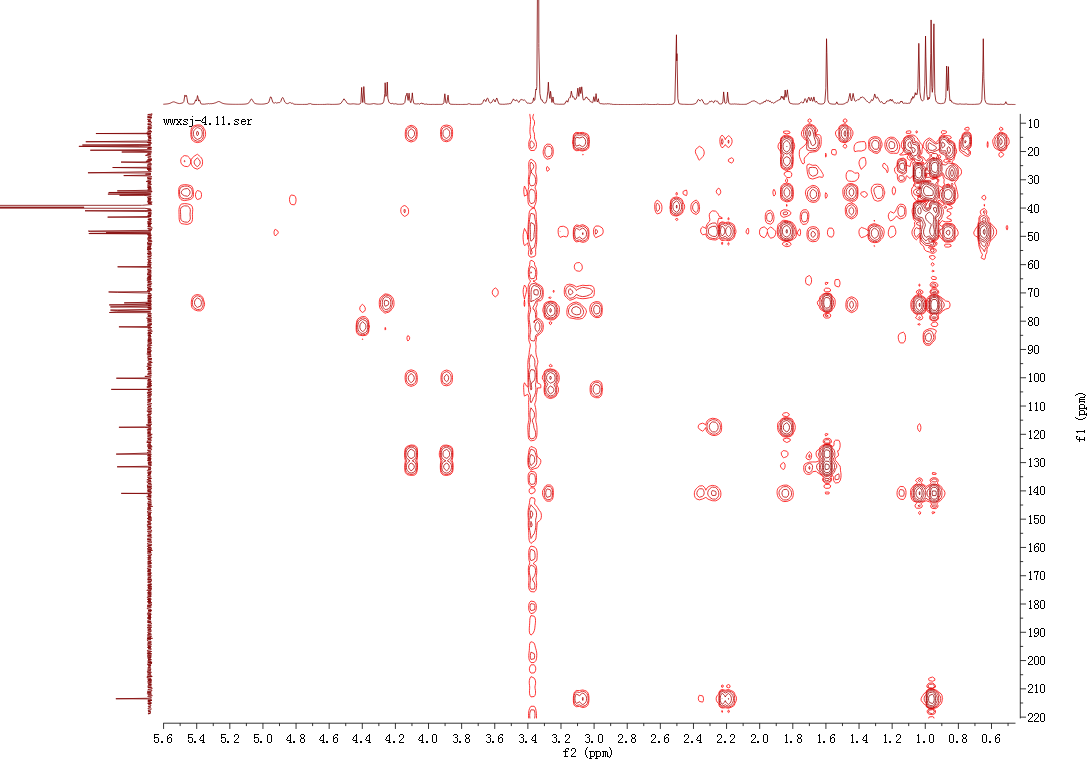


**Fig. S9** 1H-1H COSY spectrum (DMSO-*d6*) of hemslepenside J (**1**)


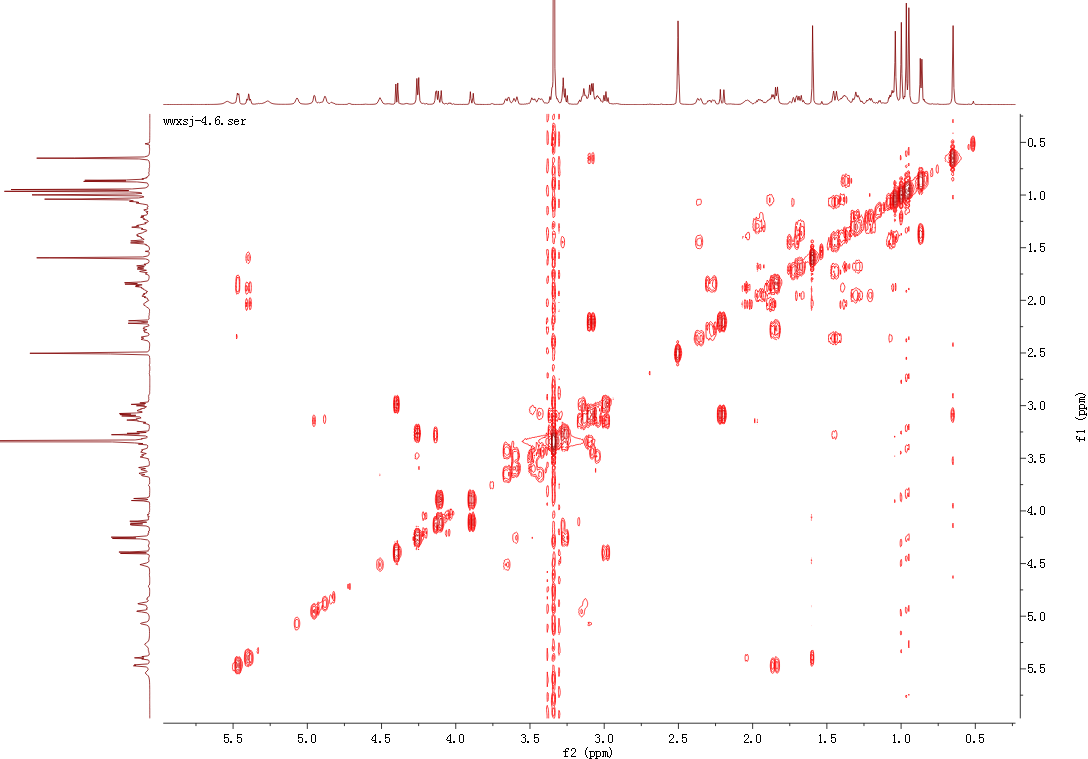


**Fig. S10** NOESY spectrum (DMSO-*d6*) of hemslepenside J (**1**)


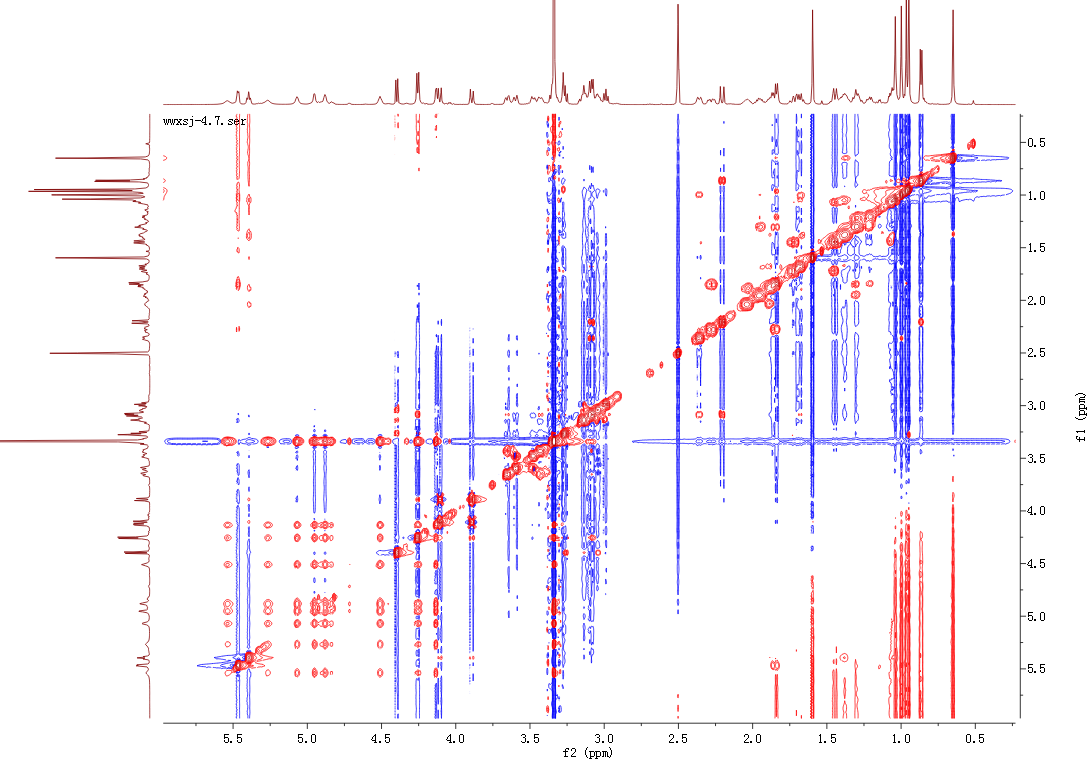


**Fig. S11** HRESIMS of hemslepenside K (**2**)


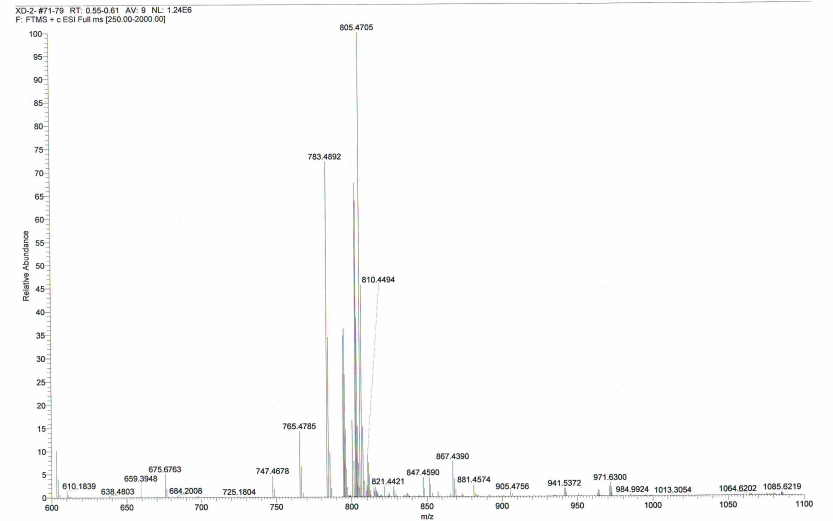


**Fig. S12** IR spectrum (KBr) of hemslepenside K (**2**)

**Fig. S13** 1H NMR spectrum (MeOH-*d4*, 600 MHz) of hemslepenside K (**2**)


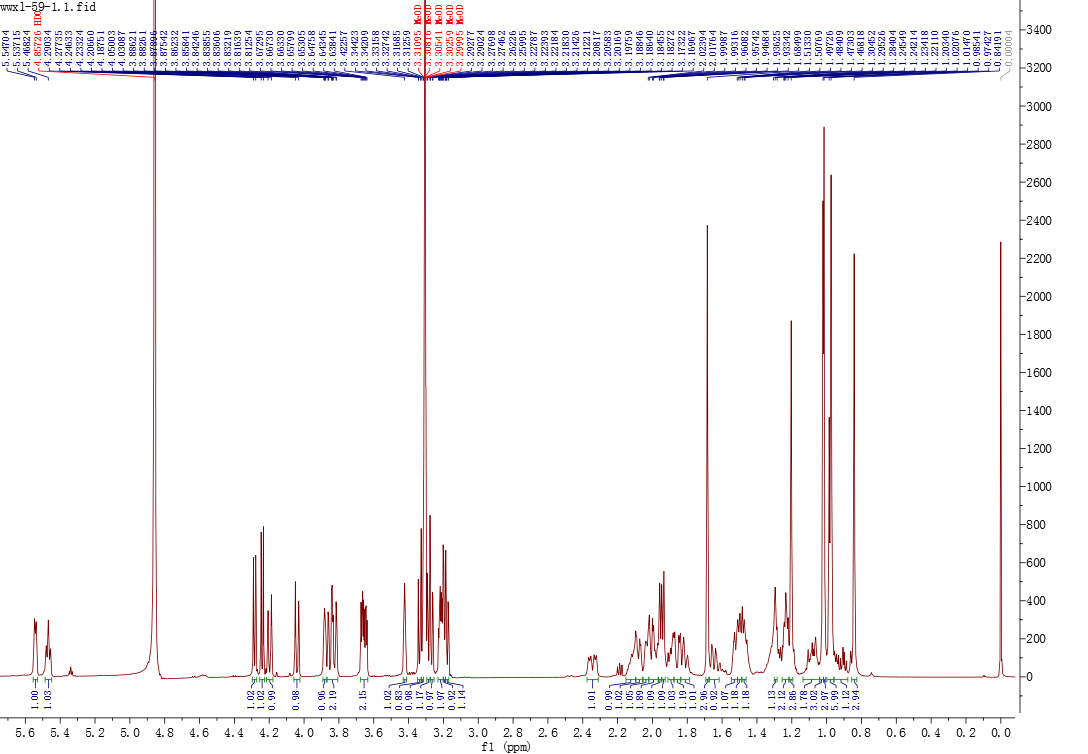


**Fig. S14** 13C NMR spectrum (MeOH-*d4*, 150 MHz) of hemslepenside K (**2**)


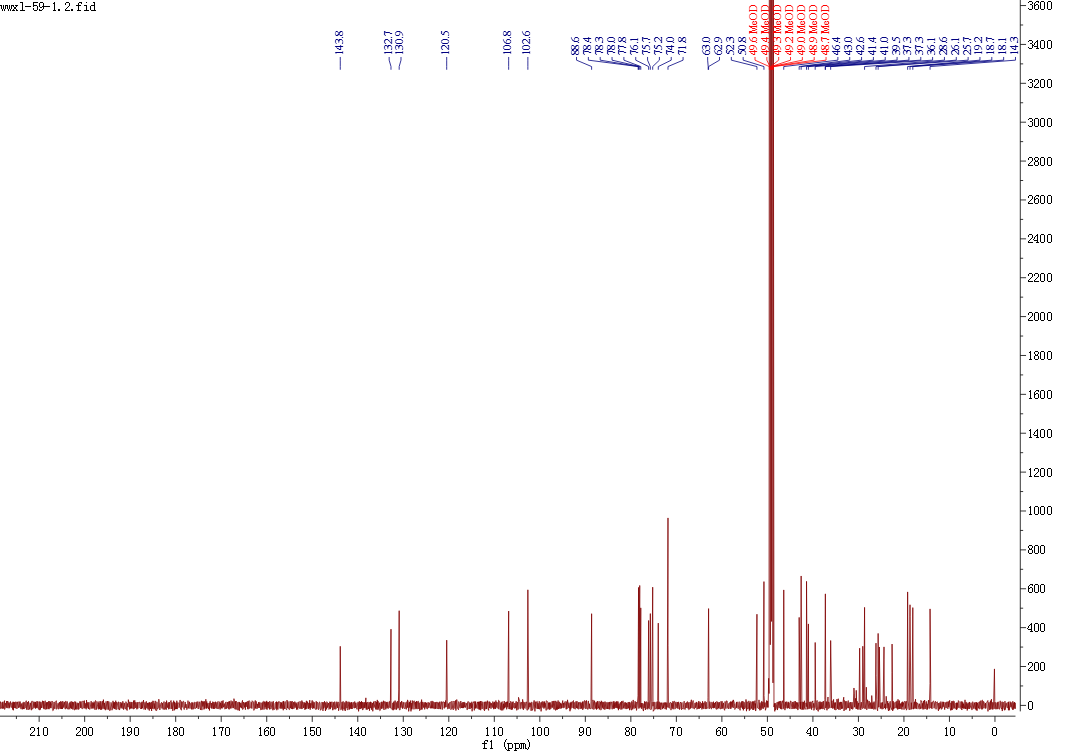


**Fig. S15** DEPT 90° spectrum **(**MeOH-*d4***)** of hemslepenside K (**2**)


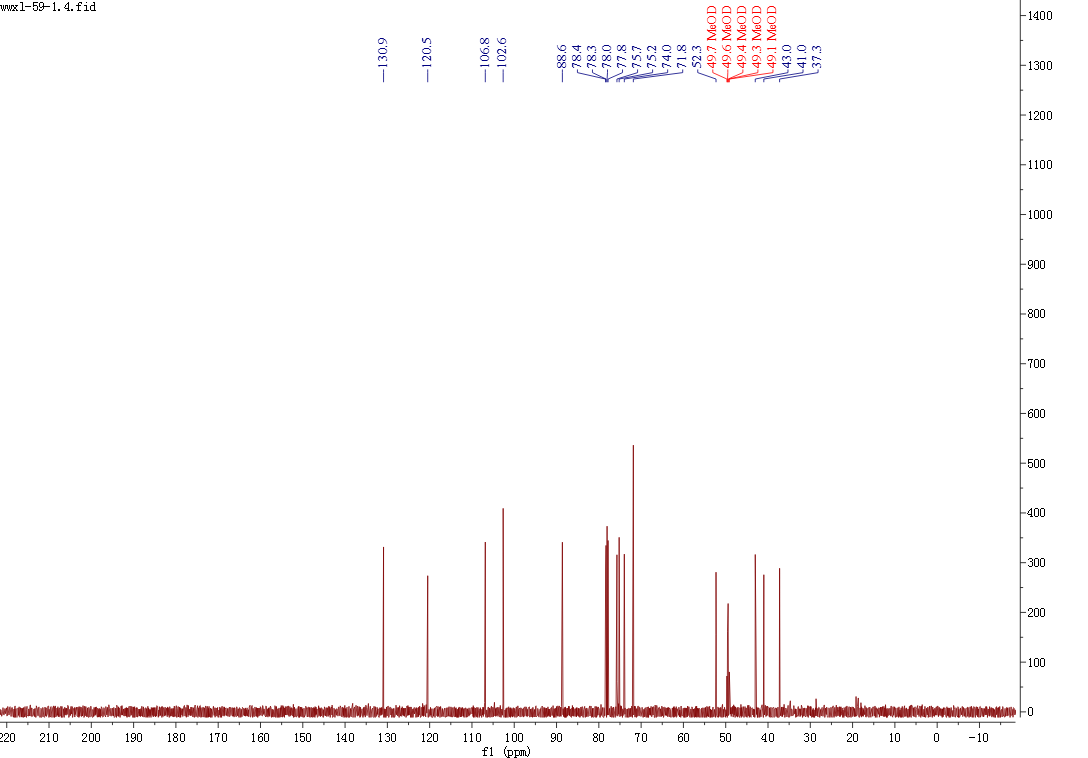


**Fig. S16** DEPT 135° spectrum **(**MeOH-*d4***)** of hemslepenside K (**2**)


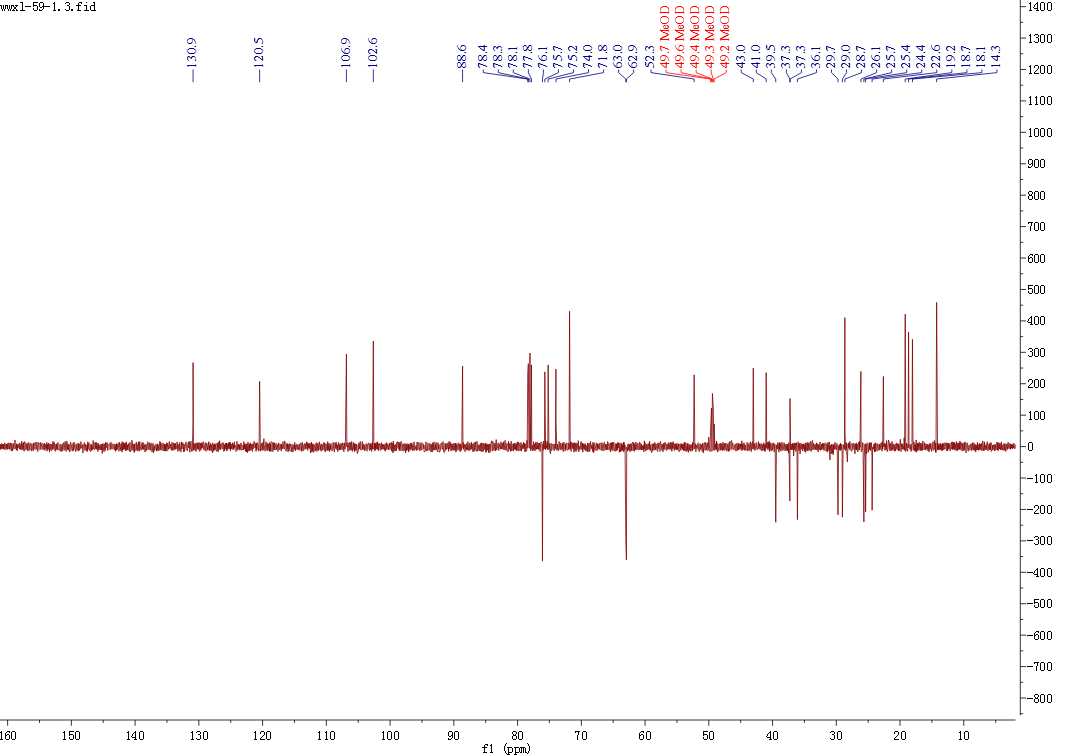


**Fig. S17** HSQC spectrum (MeOH-*d4*) of hemslepenside K (**2**)


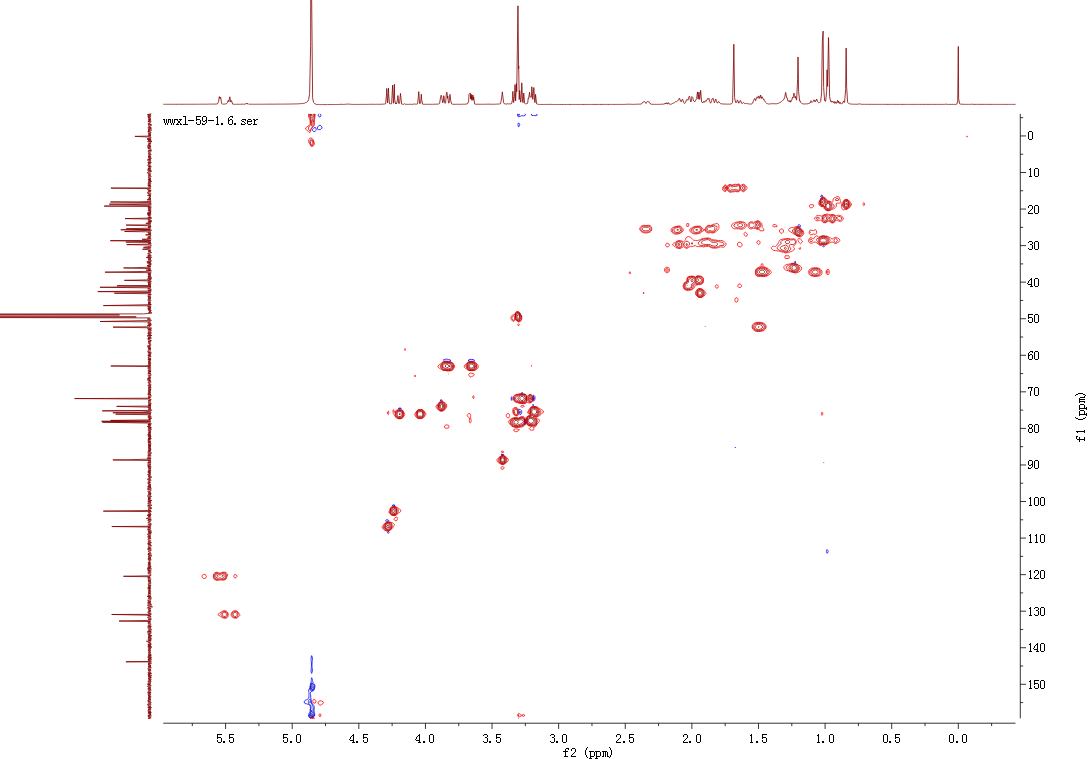


**Fig. S18** HMBC spectrum (MeOH-*d4*) of hemslepenside K (**2**)


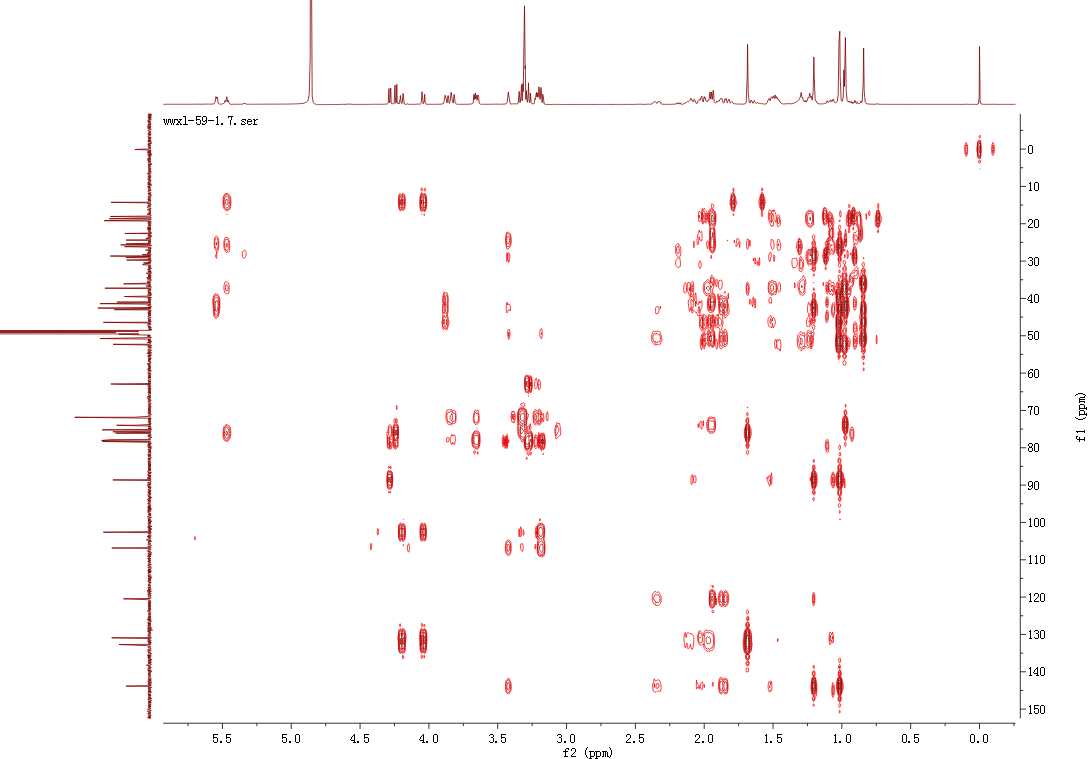


**Fig. S19** 1H-1H COSY spectrum (MeOH-*d4*) of hemslepenside K (**2**)


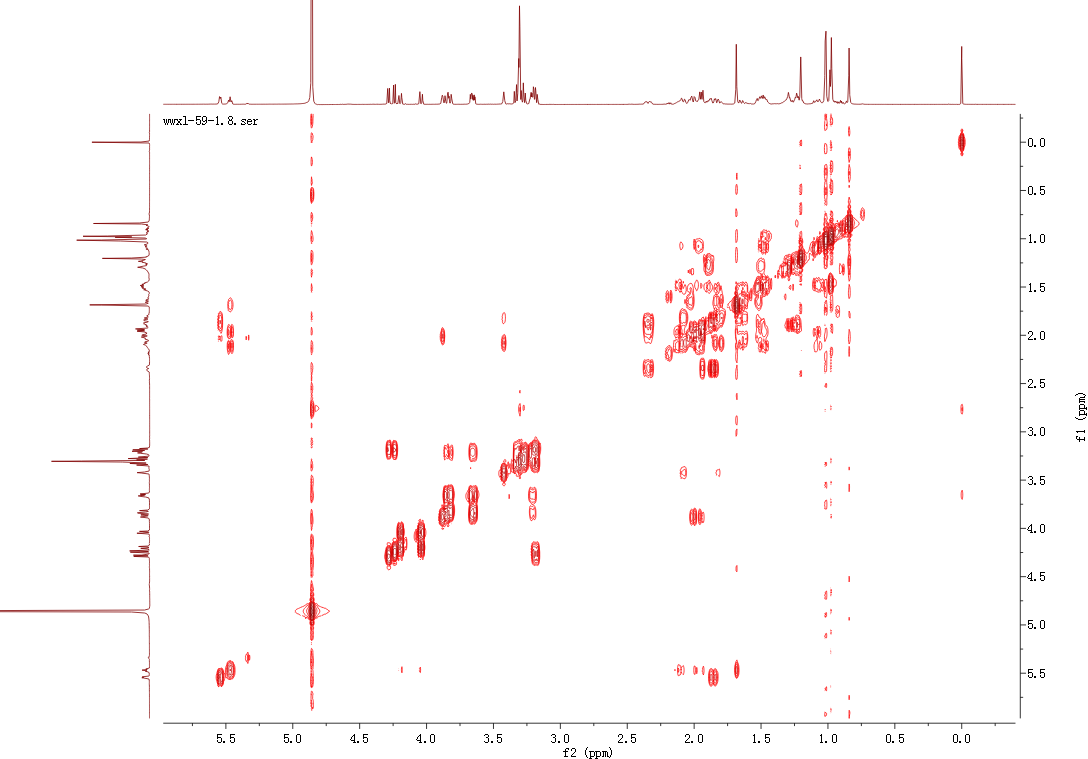


**Fig. S20** NOESY spectrum (MeOH-*d4*) of hemslepenside K (**2**)


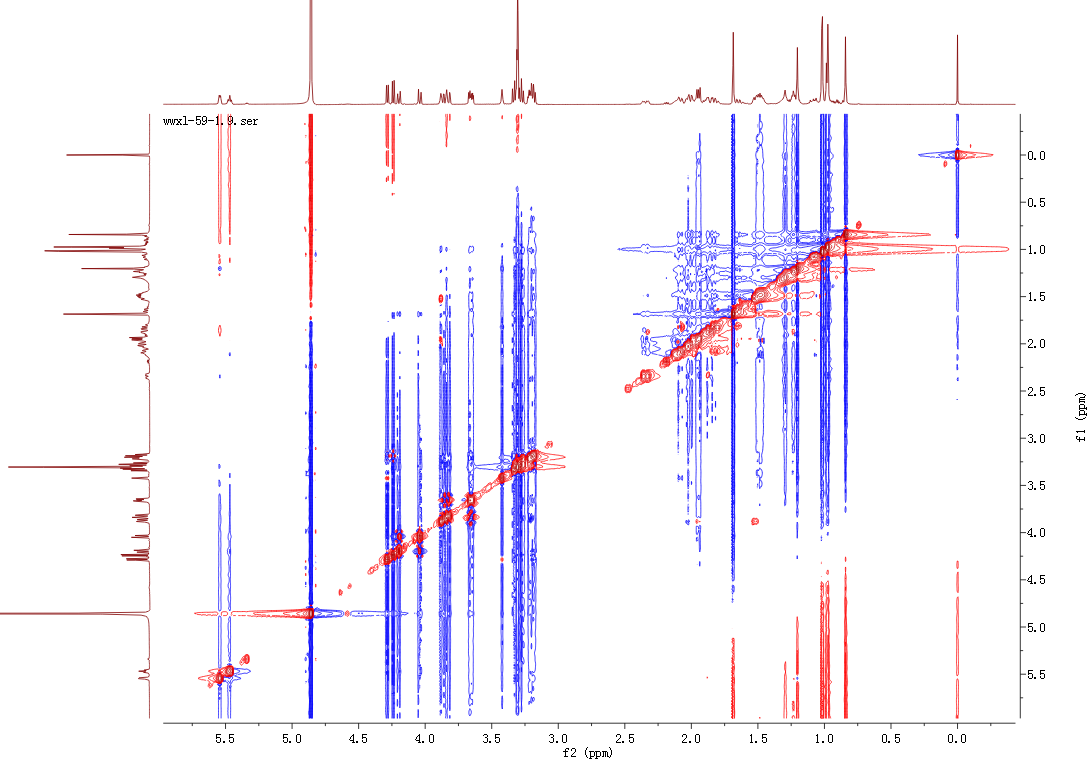


**Fig. S21** HRESIMS of hemslepenside L (**3**)


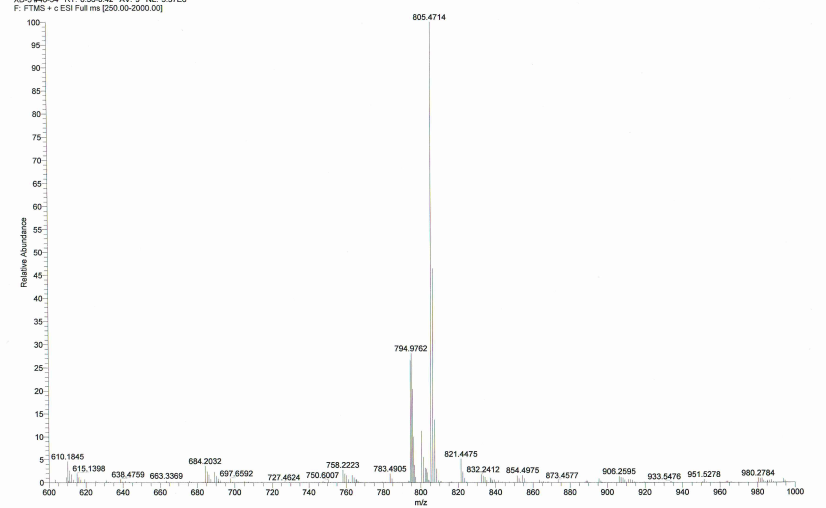


**Fig. S22** IR spectrum (KBr) of hemslepenside L (**3**)

**Fig. S23** 1H NMR spectrum (MeOH-*d4*, 600 MHz) of hemslepenside L (**3**)


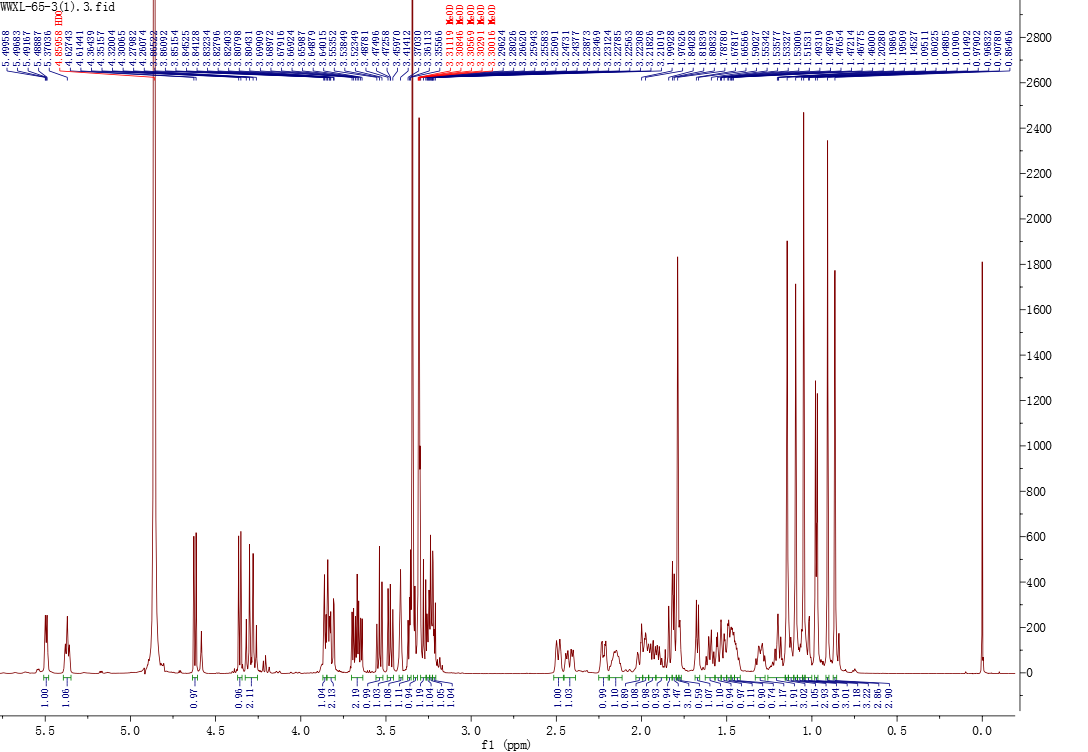


**Fig. S24** 13C NMR spectrum (MeOH-*d4*, 150 MHz) of hemslepenside L (**3**)


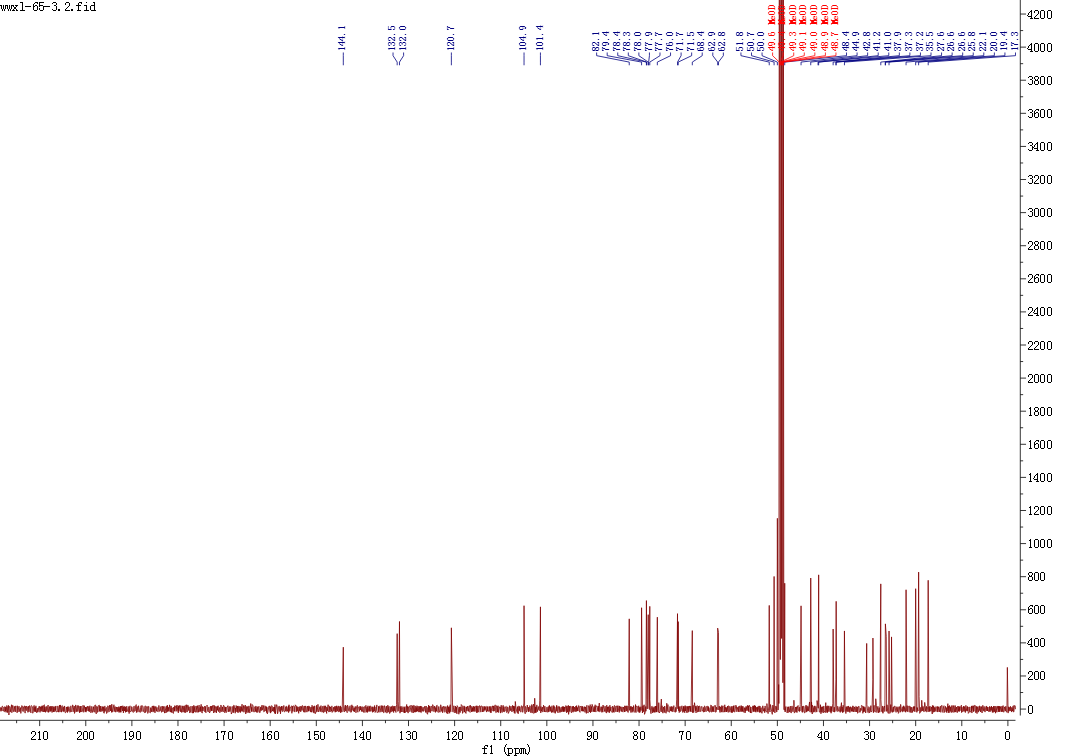


**Fig. S25** DEPT 90° spectrum **(**MeOH-*d4***)** of hemslepenside L (**3**)


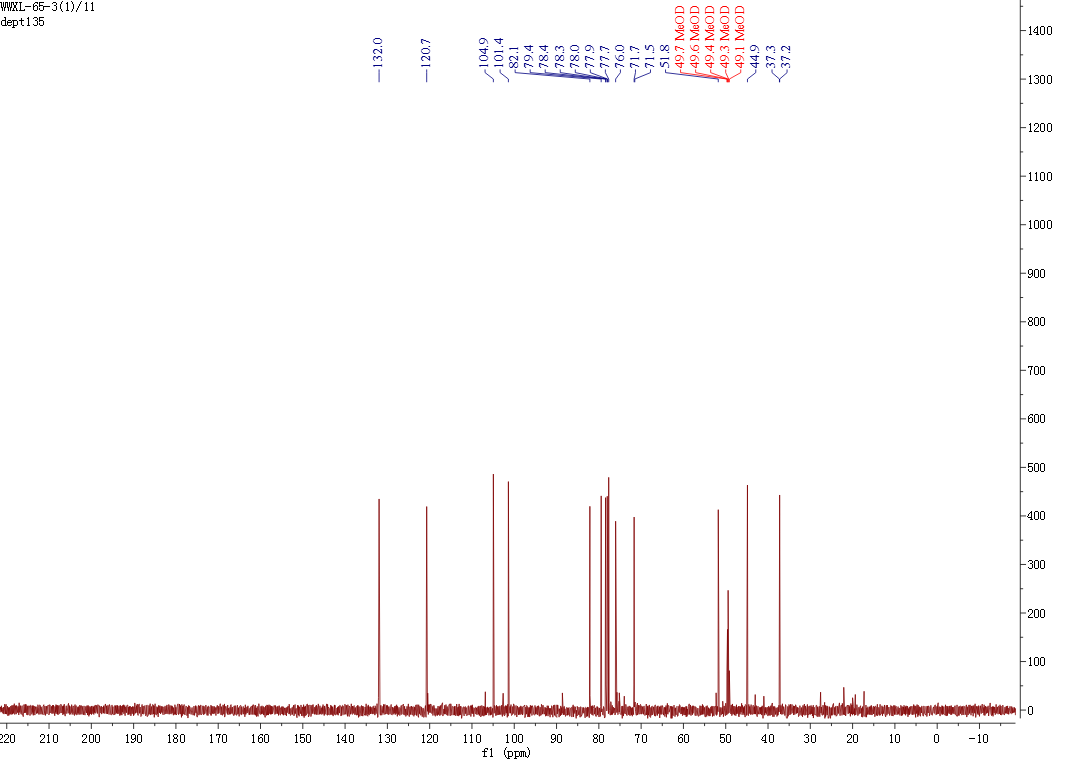


**Fig. S26** DEPT 135° spectrum **(**MeOH-*d4***)** of hemslepenside L (**3**)


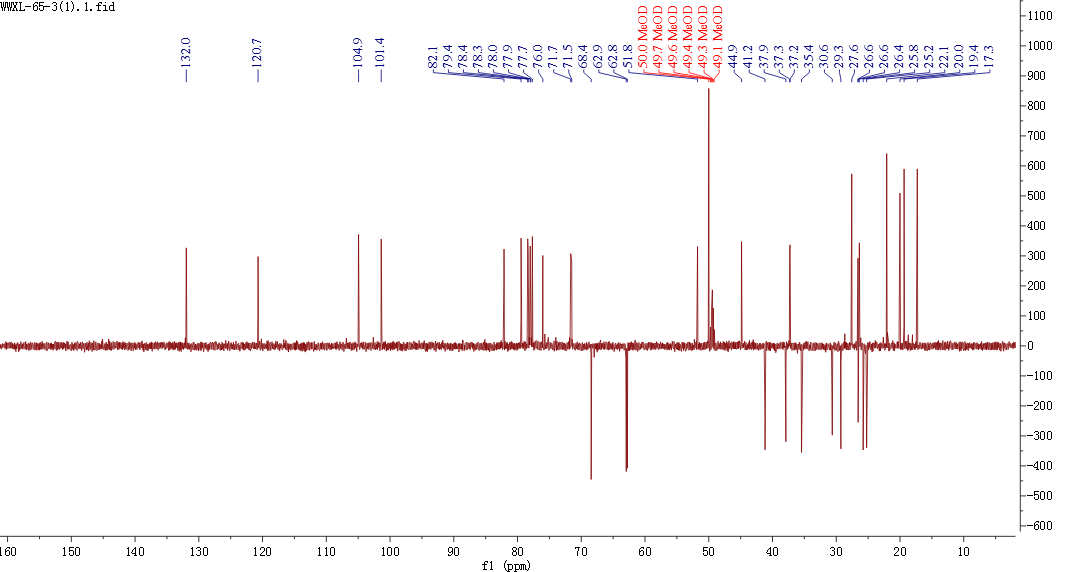


**Fig. S27** HSQC spectrum (MeOH-*d4*) of hemslepenside L (**3**)


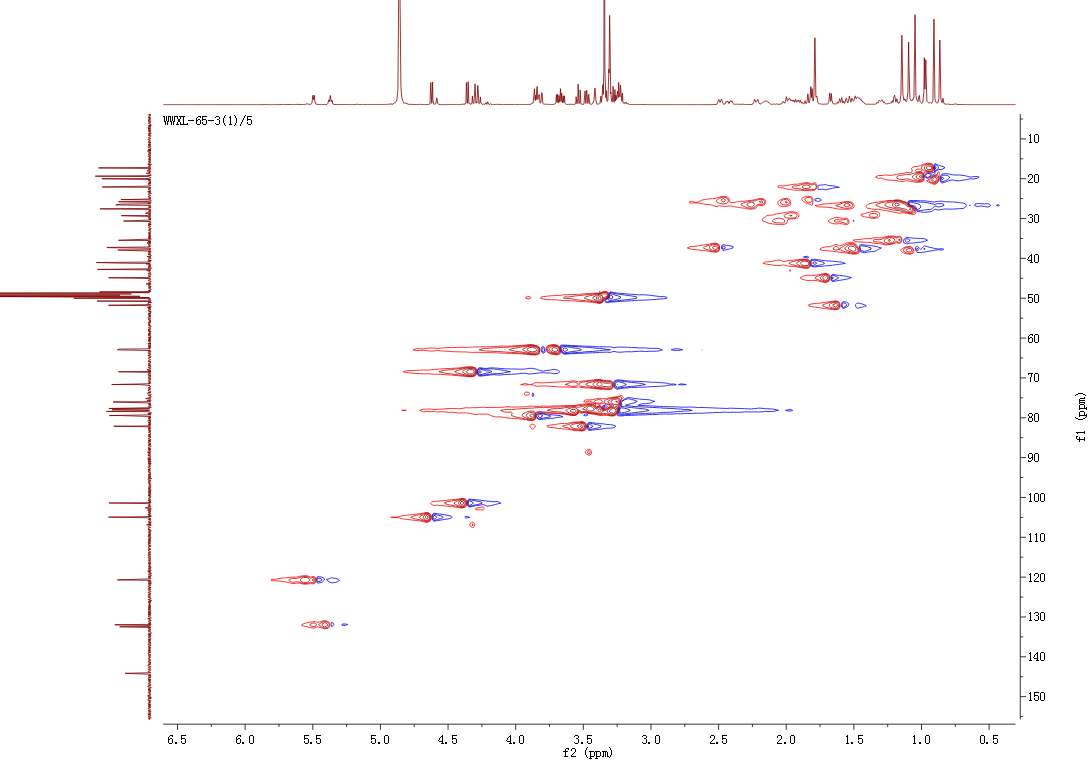


**Fig. S28** HMBC spectrum (MeOH-*d4*) of hemslepenside L (**3**)


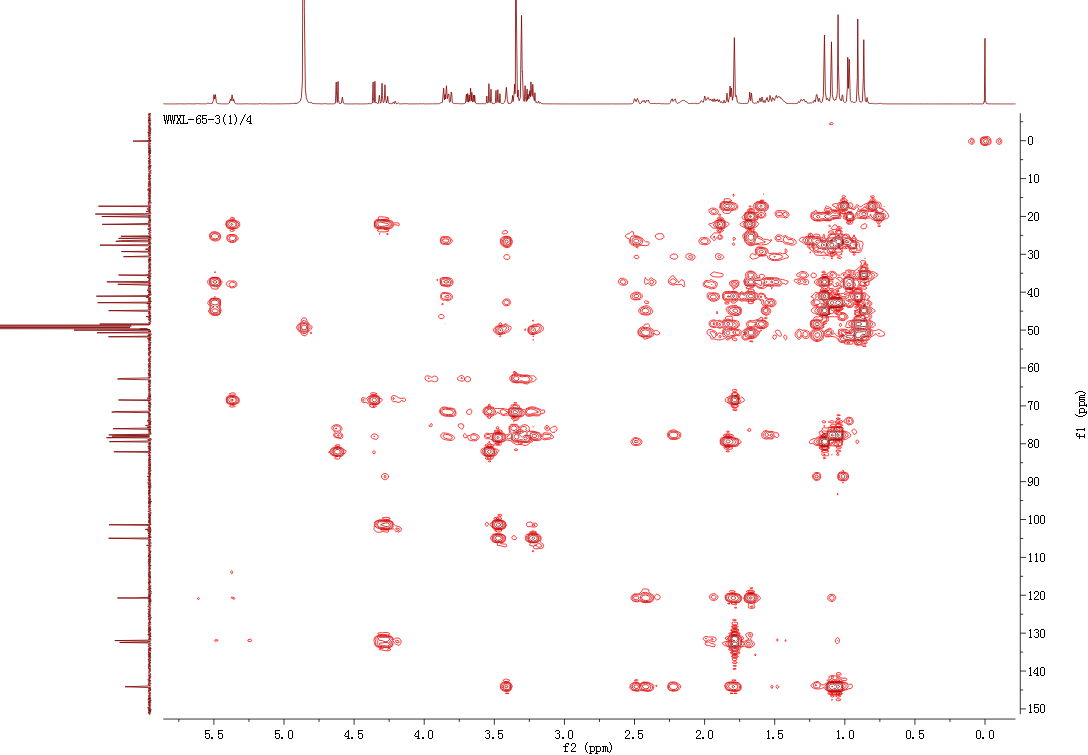


**Fig. S29** 1H-1H COSY spectrum (MeOH-*d4*) of hemslepenside L (**3**)


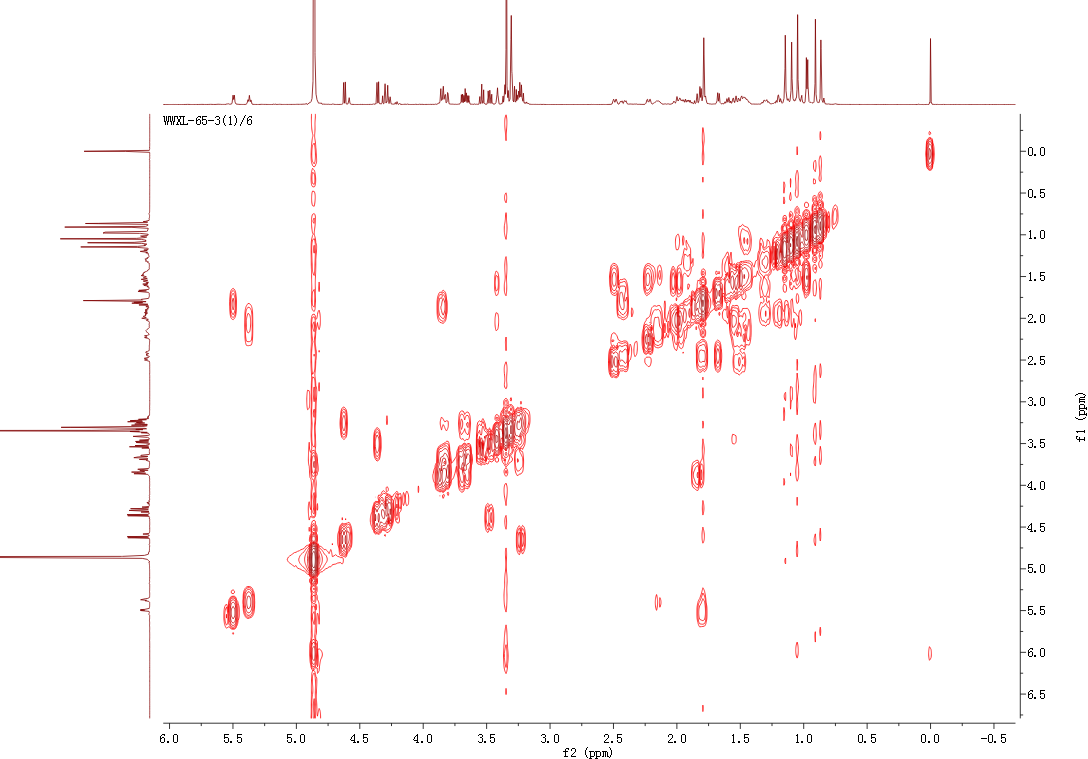


**Fig. S30** NOESY spectrum (MeOH-*d4*) of hemslepenside L (**3**)


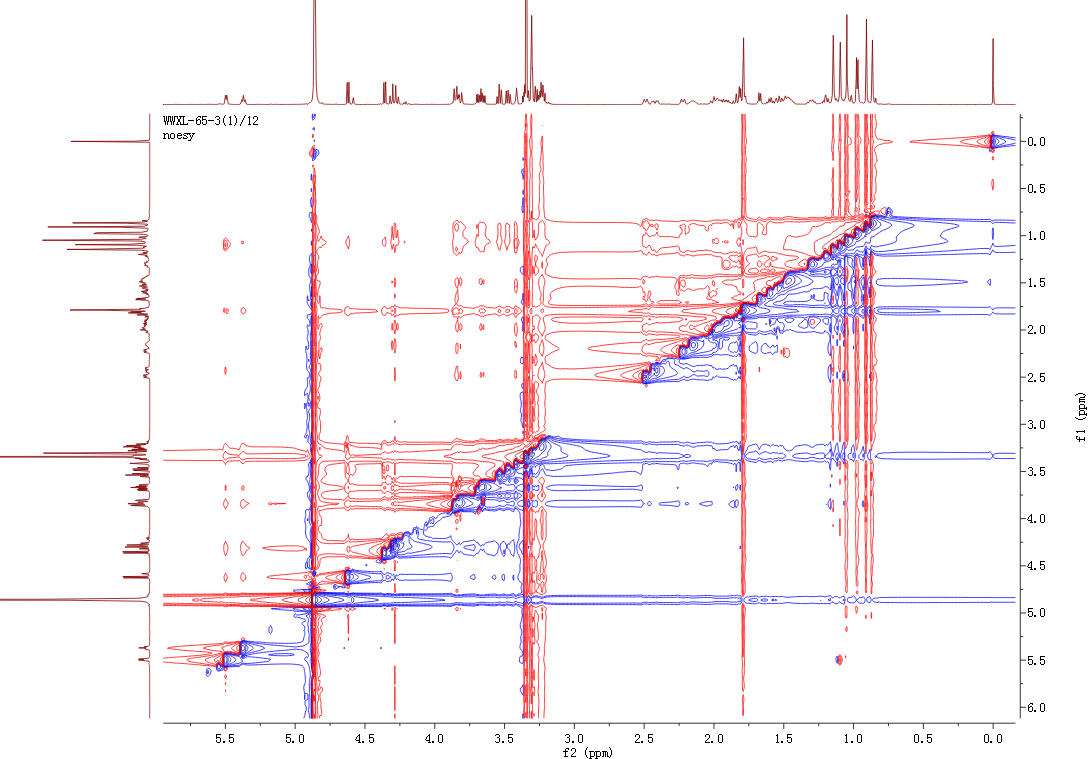


**Fig. S31** HRESIMS of hemslepenside M (**4**)


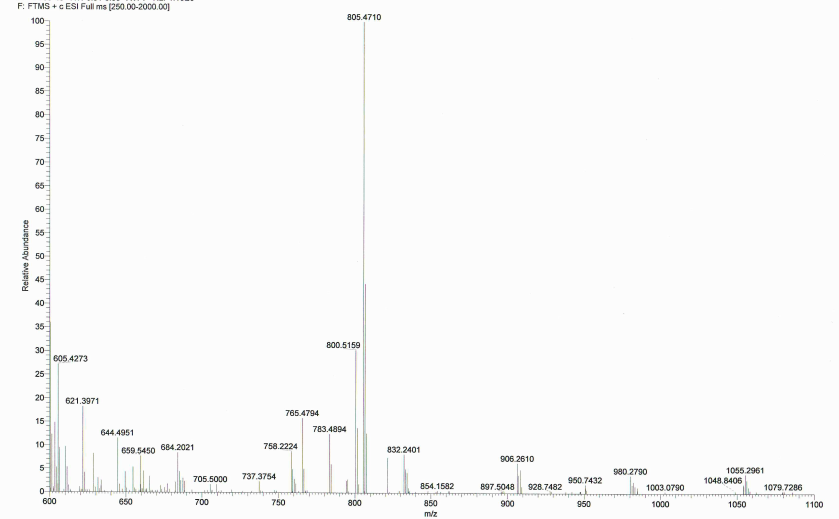


**Fig. S32** IR spectrum (KBr) of hemslepenside M (**4**)

**Fig. S33** 1H NMR spectrum (MeOH-*d4*, 600 MHz) of hemslepenside M (**4**)


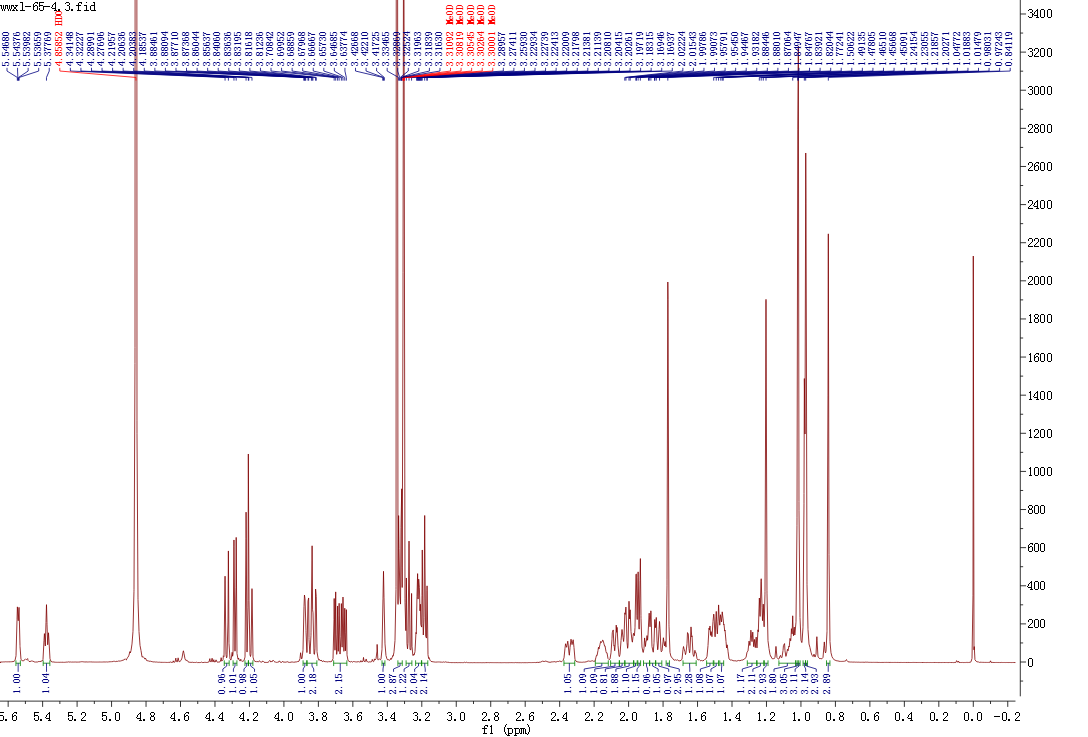


**Fig. S34** 13C NMR spectrum (MeOH-*d4*, 150 MHz) of hemslepenside M (**4**)


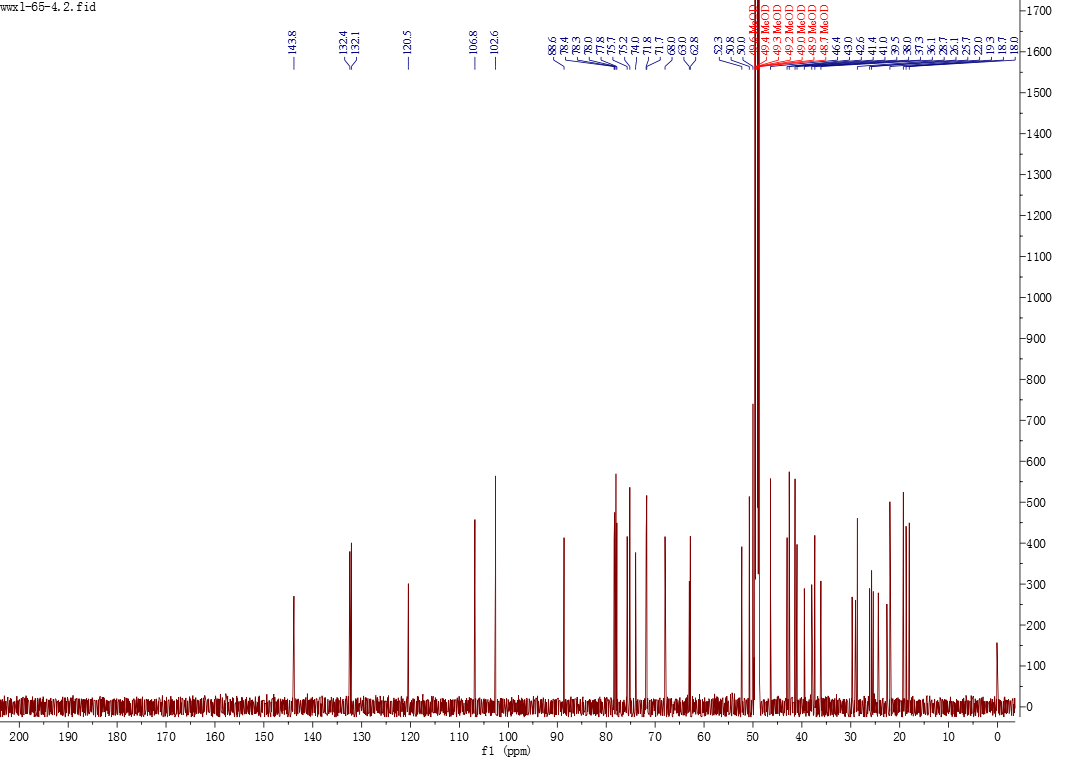


**Fig. S35** DEPT 90° spectrum **(**MeOH-*d4***)** of hemslepenside M (**4**)


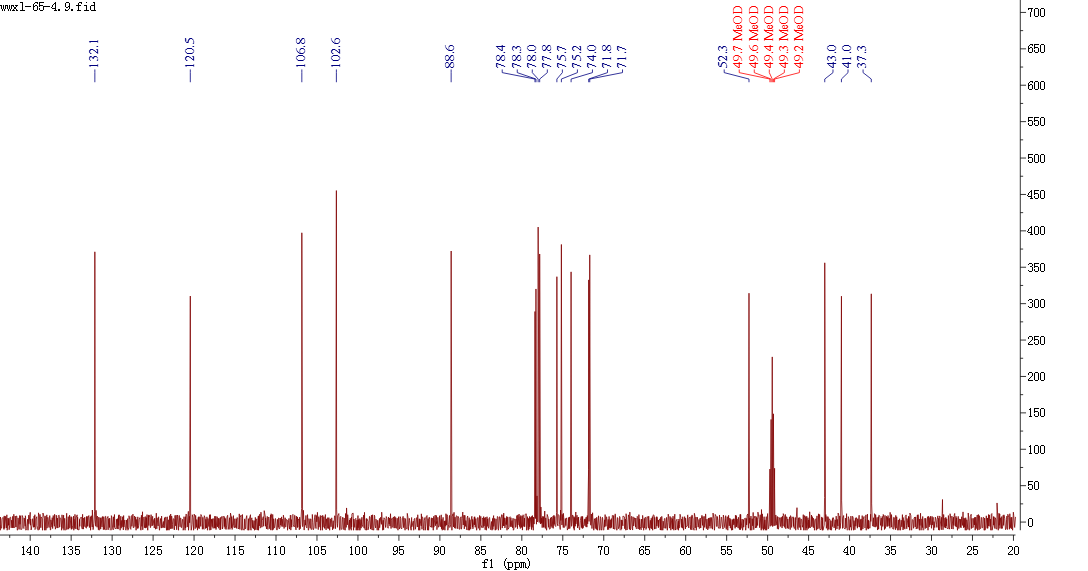


**Fig. S36** DEPT 135° spectrum **(**MeOH-*d4***)** of hemslepenside M (**4**)


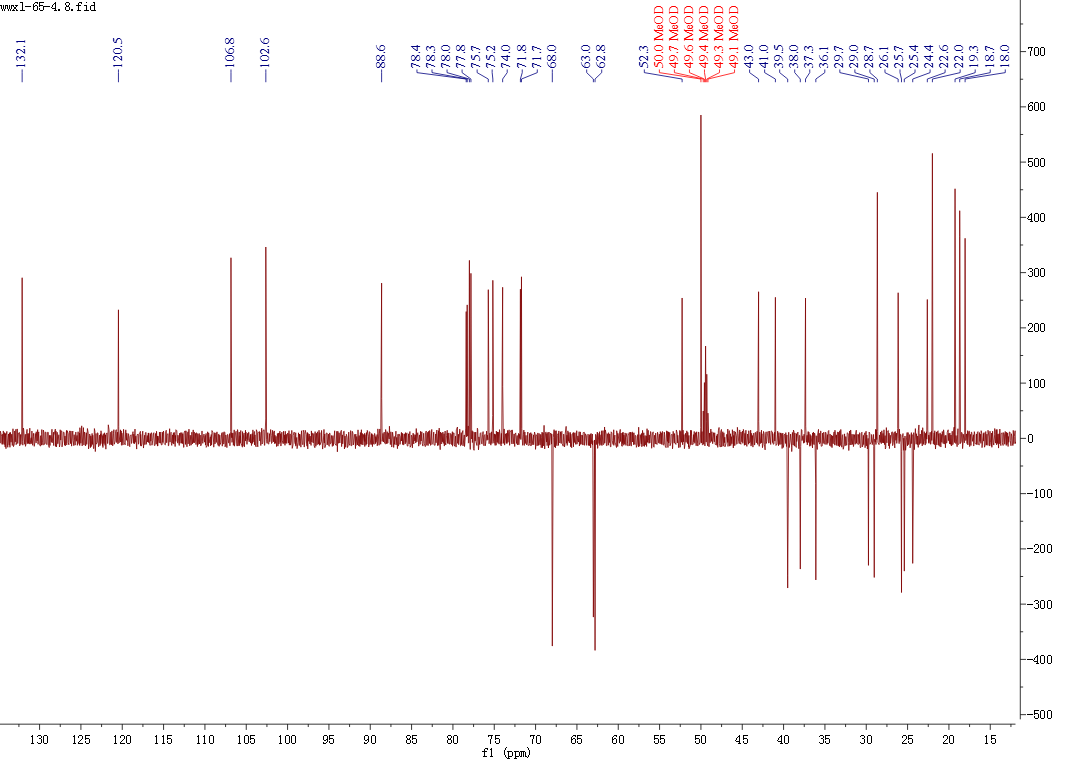


**Fig. S37** HSQC spectrum (MeOH-*d4*) of hemslepenside M (**4**)


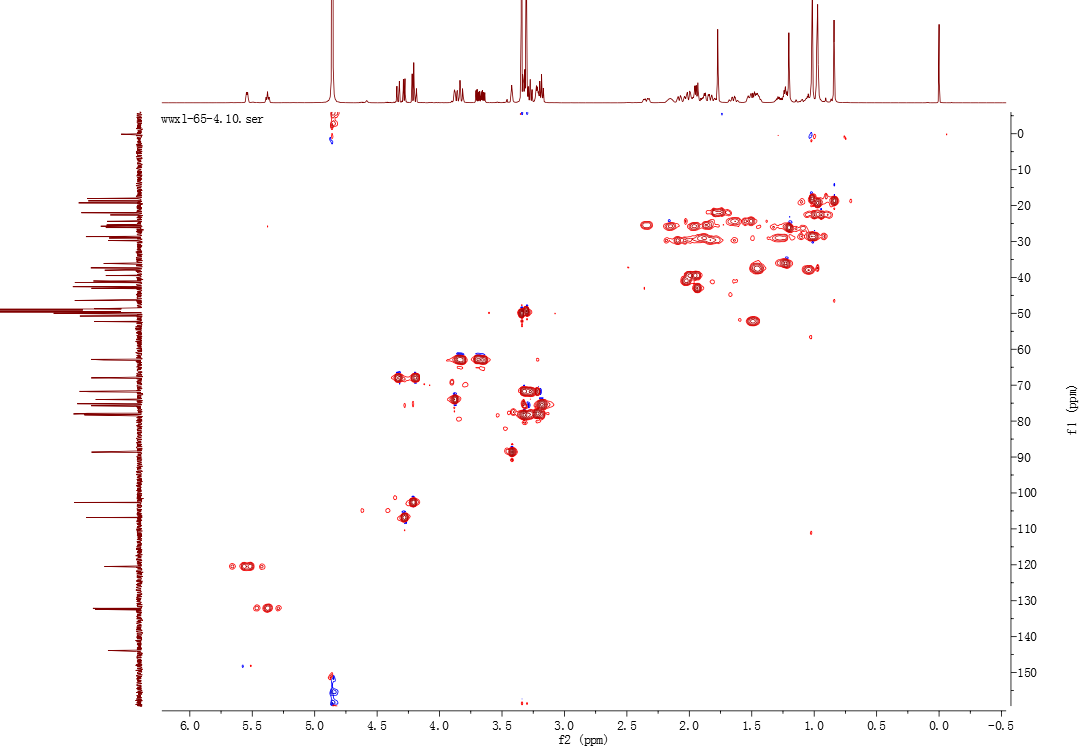


**Fig. S38** HMBC spectrum (MeOH-*d4*) of hemslepenside M (**4**)


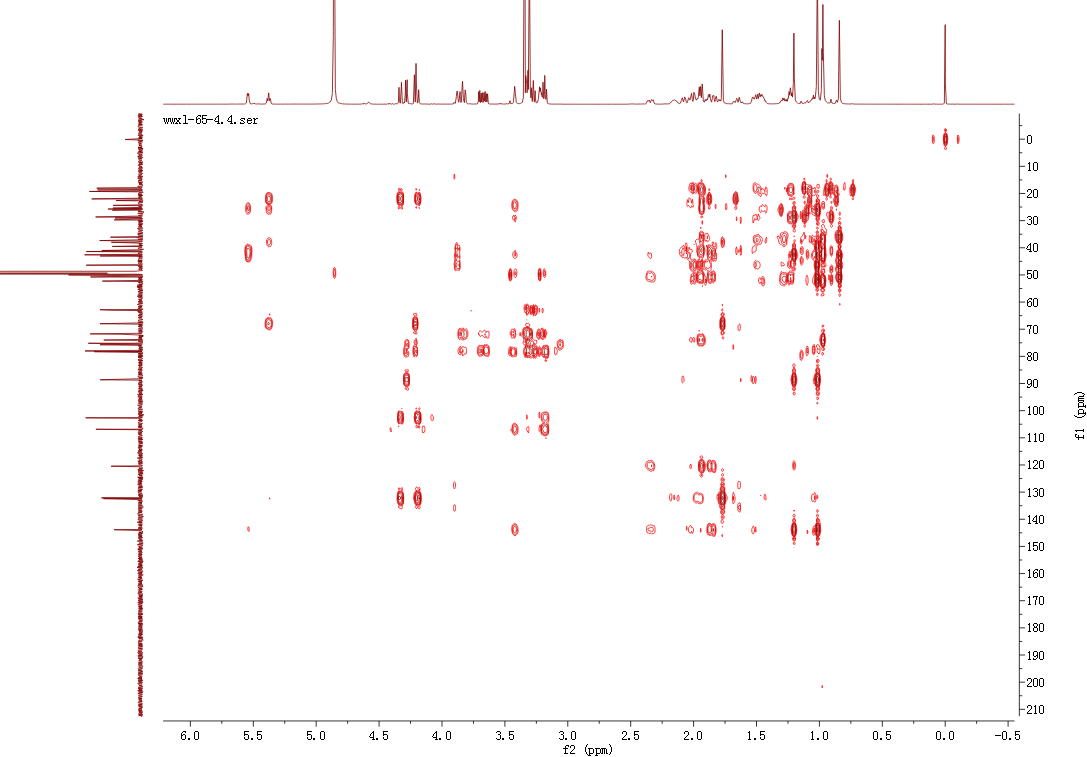


**Fig. S39** 1H-1H COSY spectrum (MeOH-*d4*) of hemslepenside M (**4**)


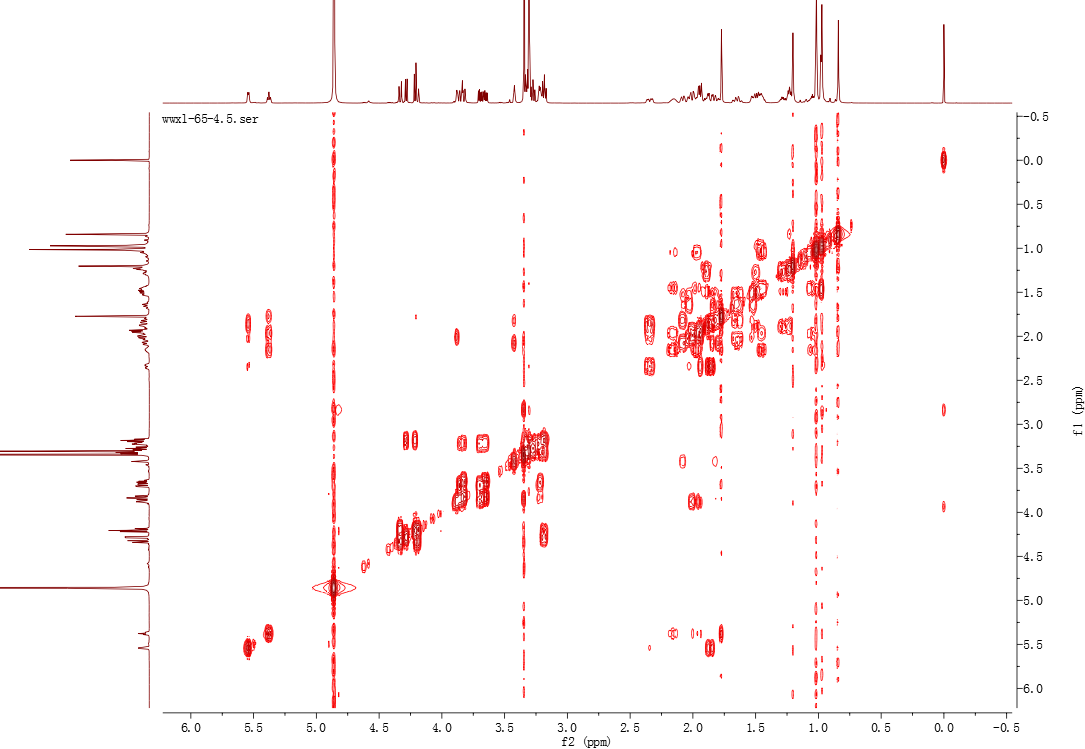


**Fig. S40** NOESY spectrum (MeOH-*d4*) of hemslepenside M (**4**)


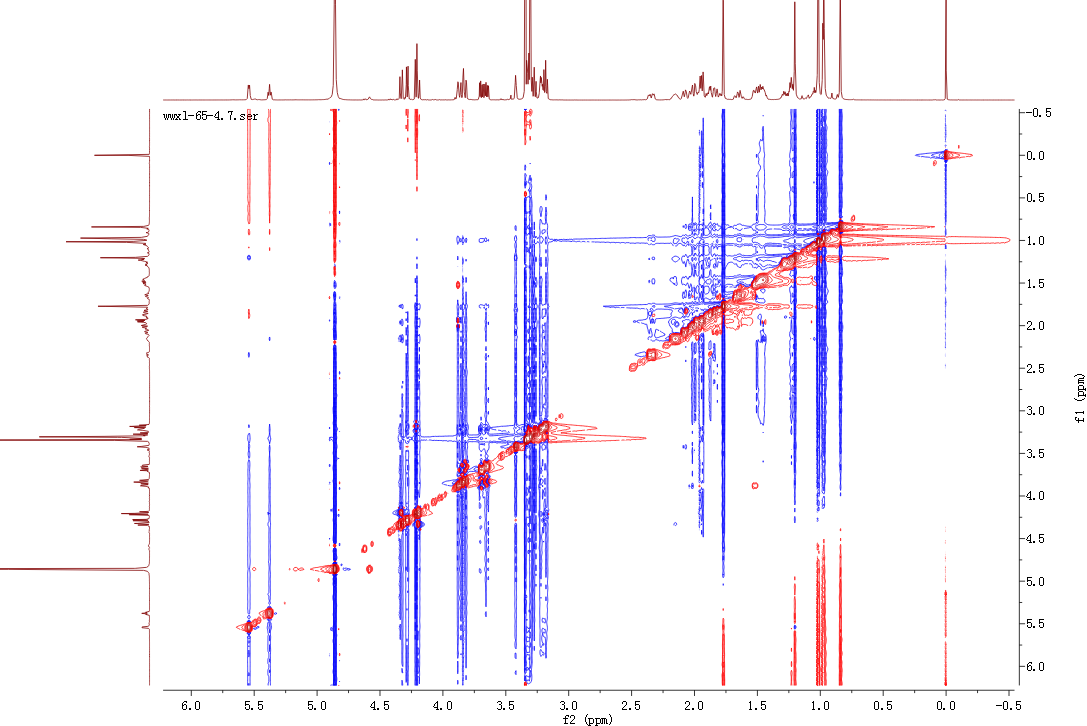


**Fig. S41** HRESIMS of hemslepenside N (**5**)


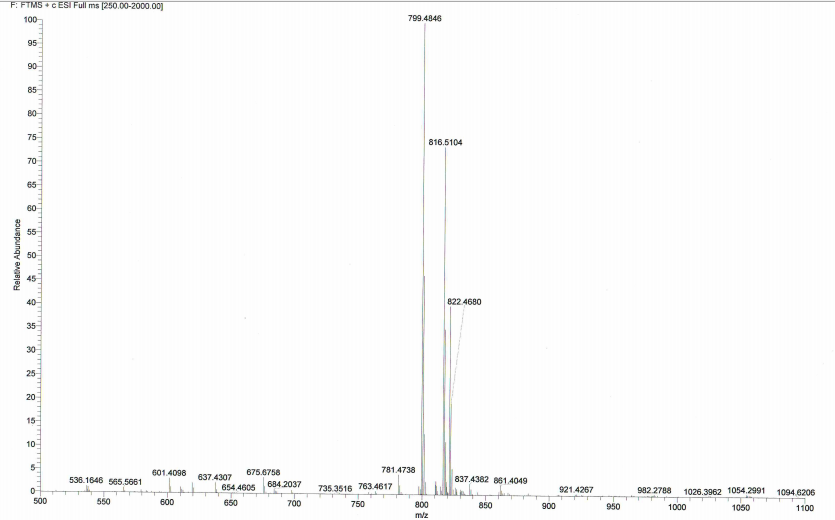


**Fig. S42** IR spectrum (KBr) of hemslepenside N (**5**)

**Fig. S43** 1H NMR spectrum (MeOH-*d4*, 600 MHz) of hemslepenside N (**5**)


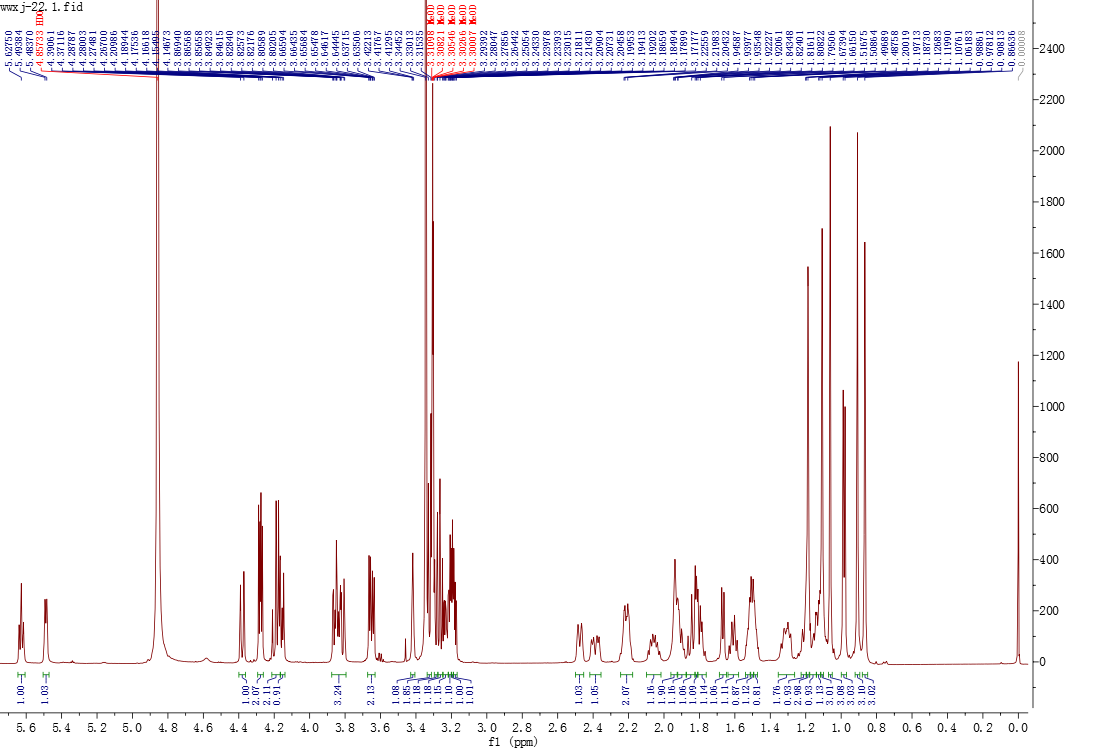


**Fig. S44** 13C NMR spectrum (MeOH-*d4*, 150 MHz) of hemslepenside N (**5**)


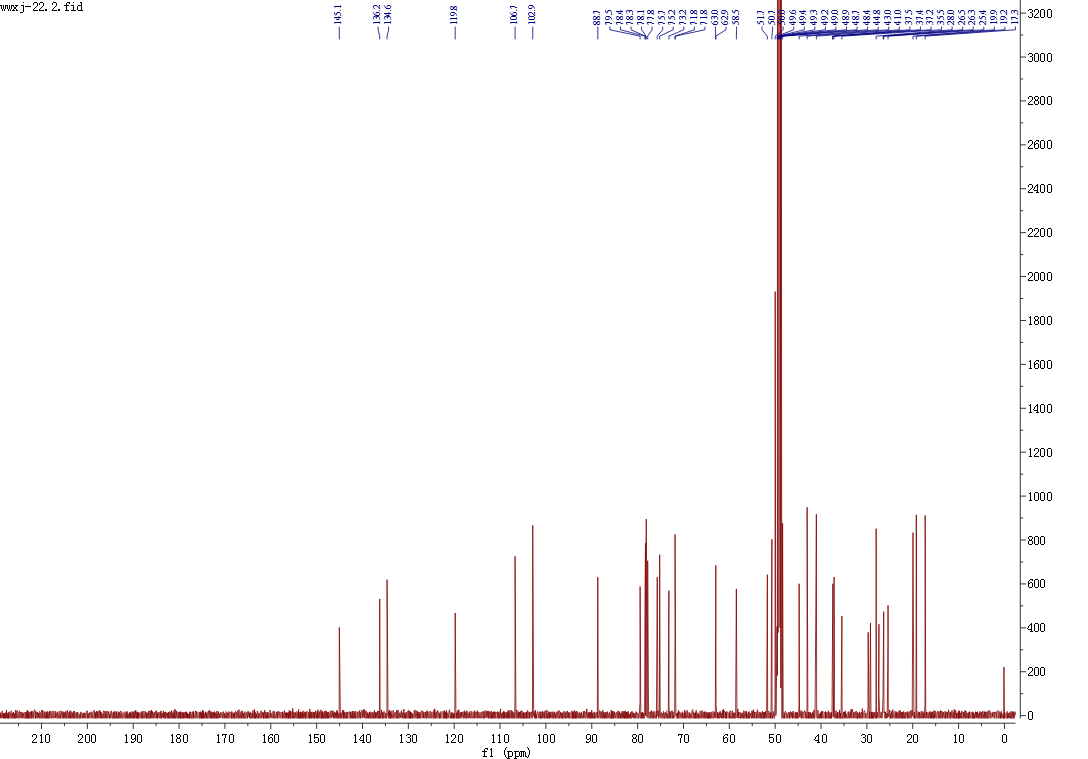


**Fig. S45** DEPT 90° spectrum **(**MeOH-*d4***)** of hemslepenside N (**5**)


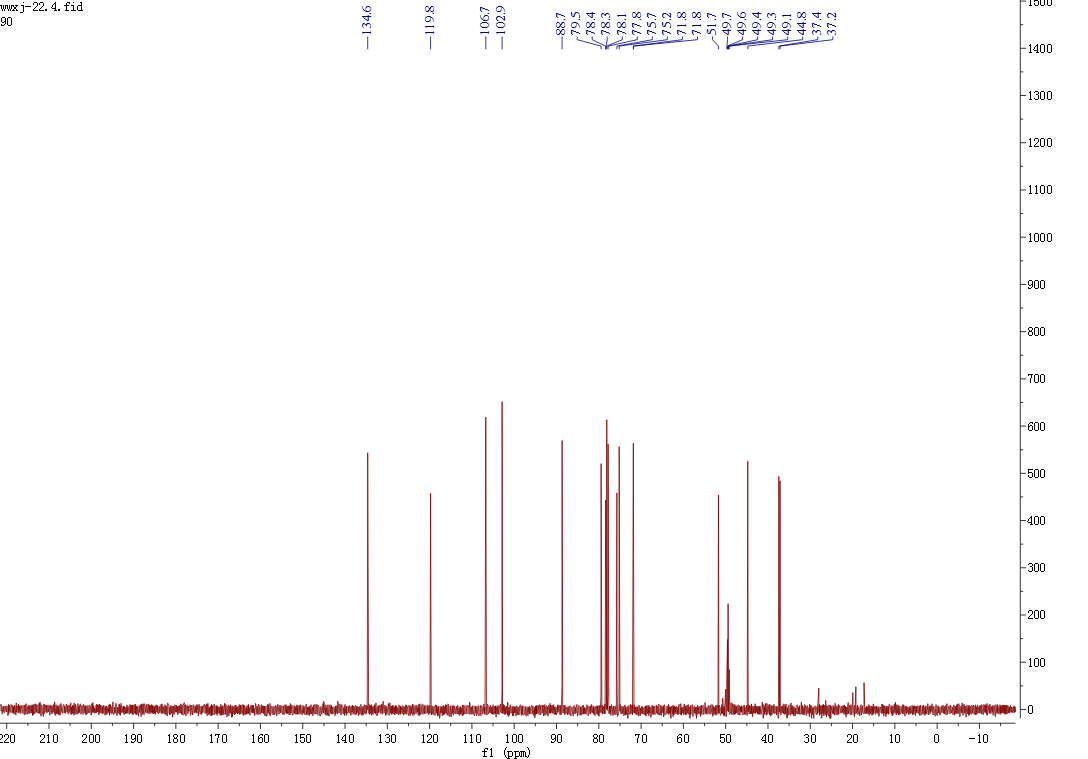


**Fig. S46** DEPT 135° spectrum **(**MeOH-*d4***)** of hemslepenside N (**5**)


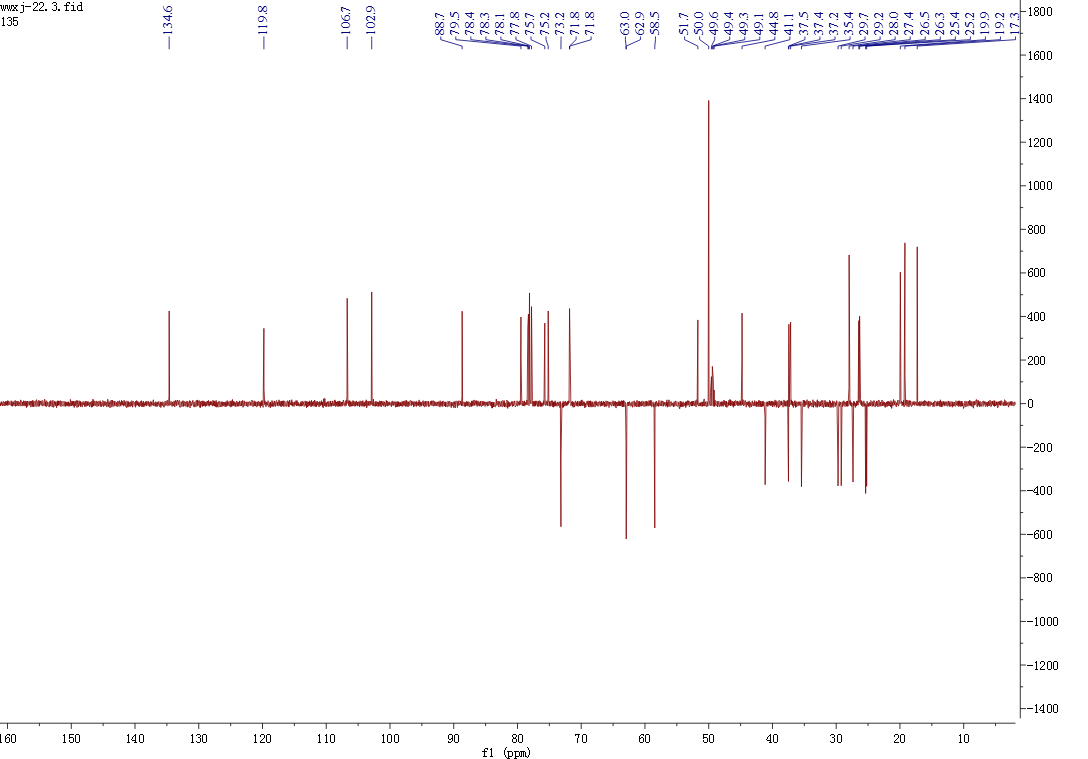


**Fig. S47** HSQC spectrum (MeOH-*d4*) of hemslepenside N (**5**)


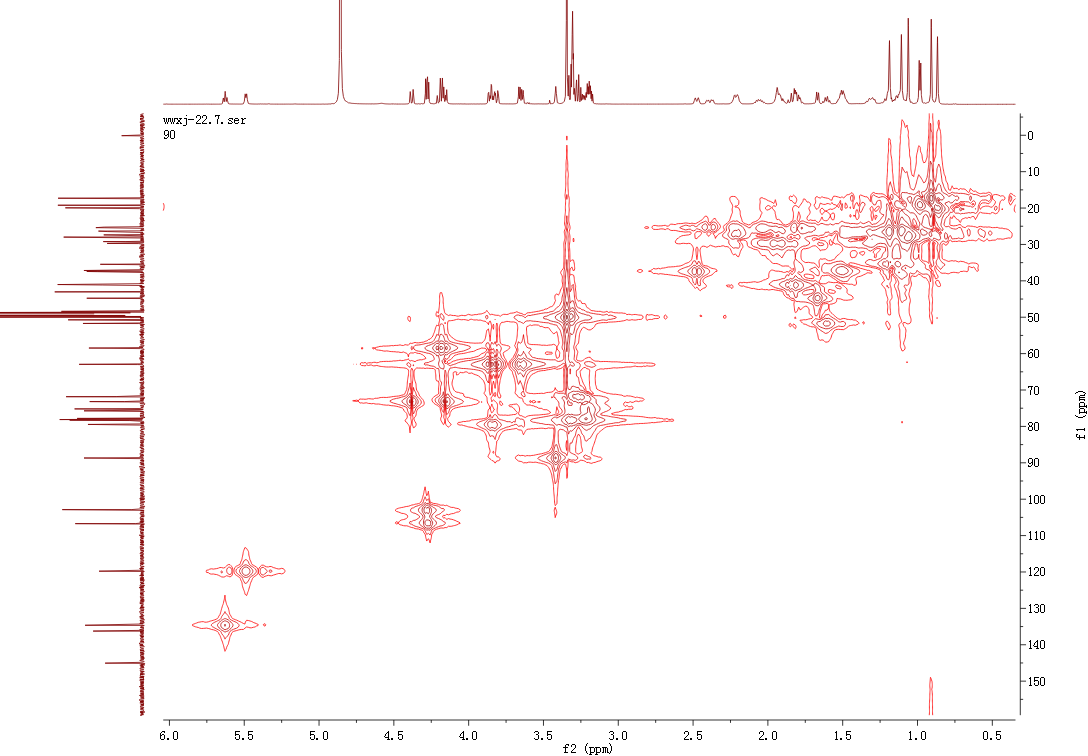


**Fig. S48** HMBC spectrum (MeOH-*d4*) of hemslepenside N (**5**)


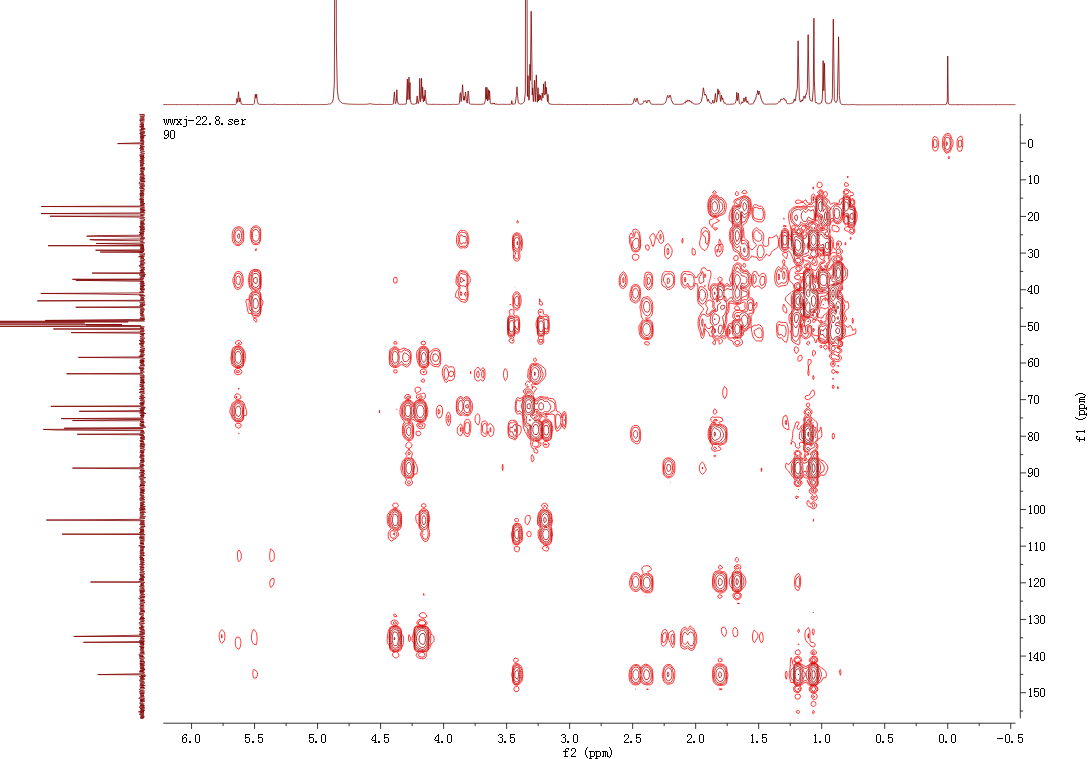


**Fig. S49** 1H-1H COSY spectrum (MeOH-*d4*) of hemslepenside N (**5**)


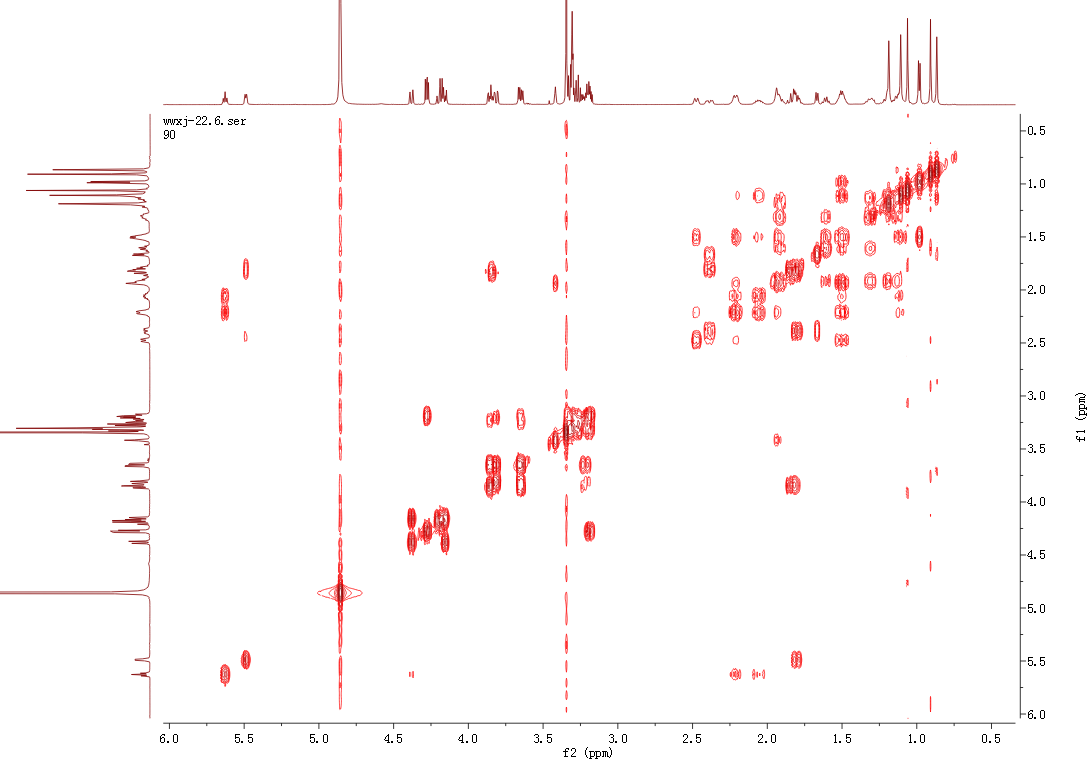


**Fig. S50** NOESY spectrum (MeOH-*d4*) of hemslepenside N (**5**)


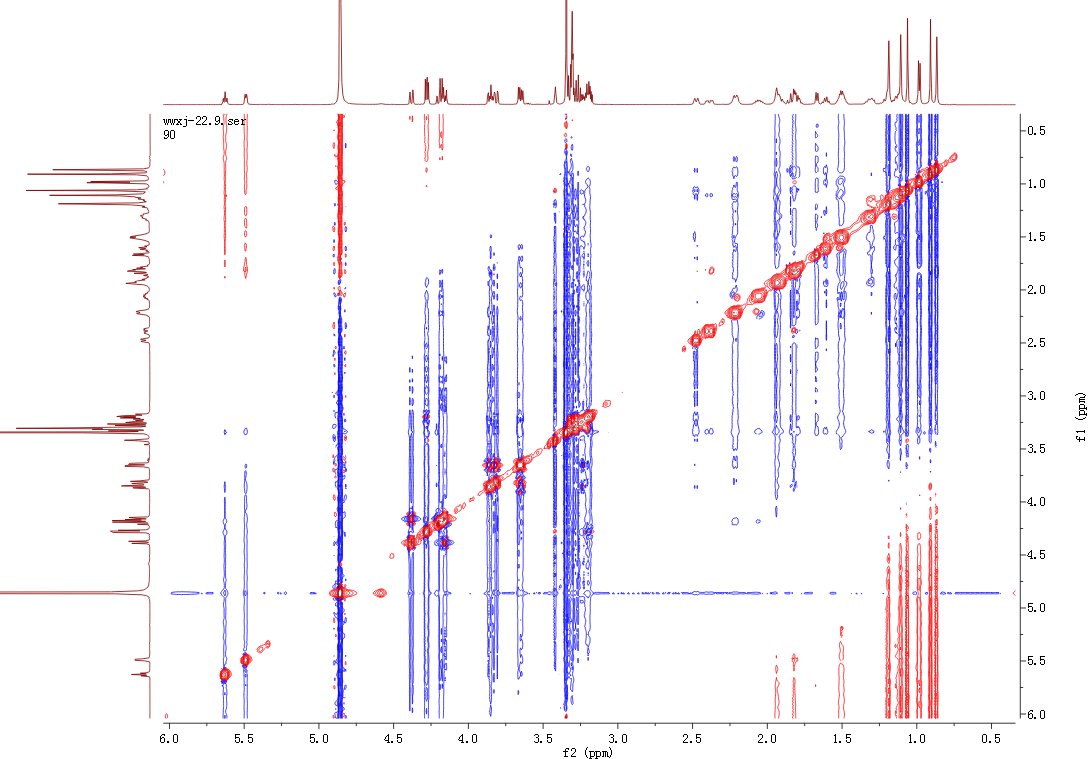


**Fig. S51** HRESIMS of hemslepenside O (**6**)


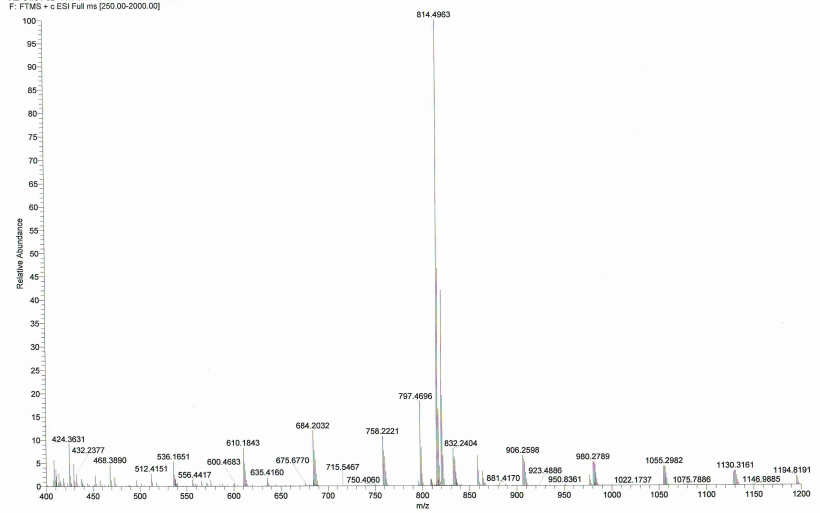


**Fig. S52** IR spectrum (KBr) of hemslepenside O (**6**)

**Fig. S53** 1H NMR spectrum (MeOH-*d4*, 600 MHz) of hemslepenside O (**6**)


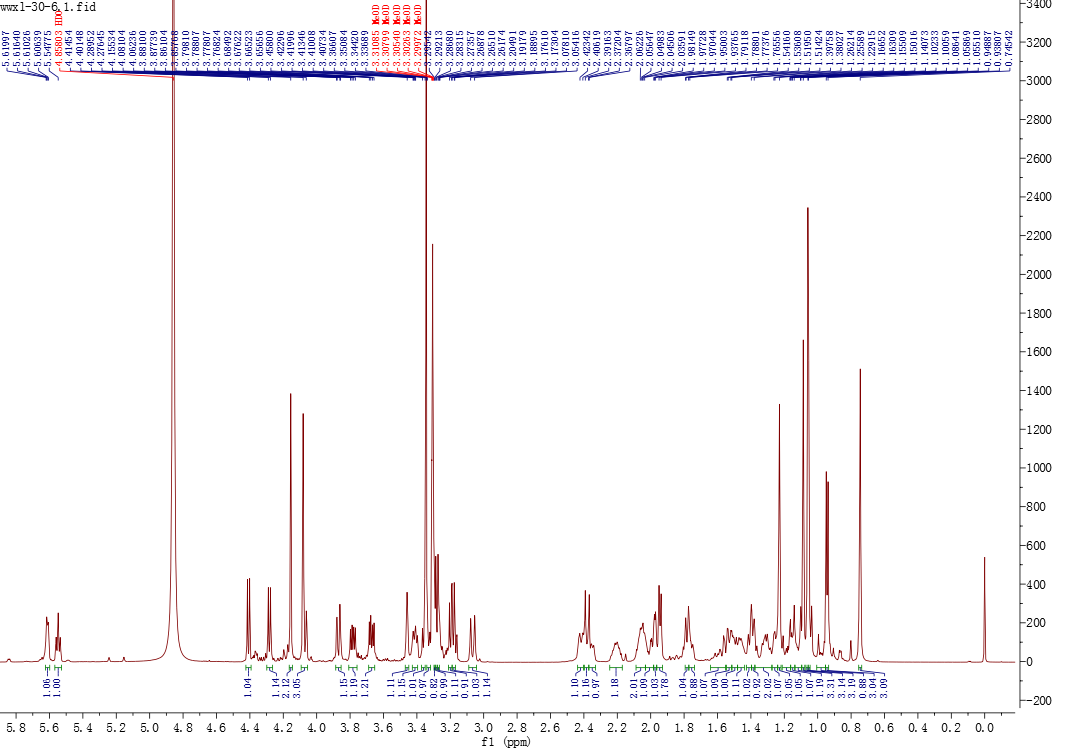


**Fig. S54** 13C NMR spectrum (MeOH-*d4*, 150 MHz) of hemslepenside O (**6**)


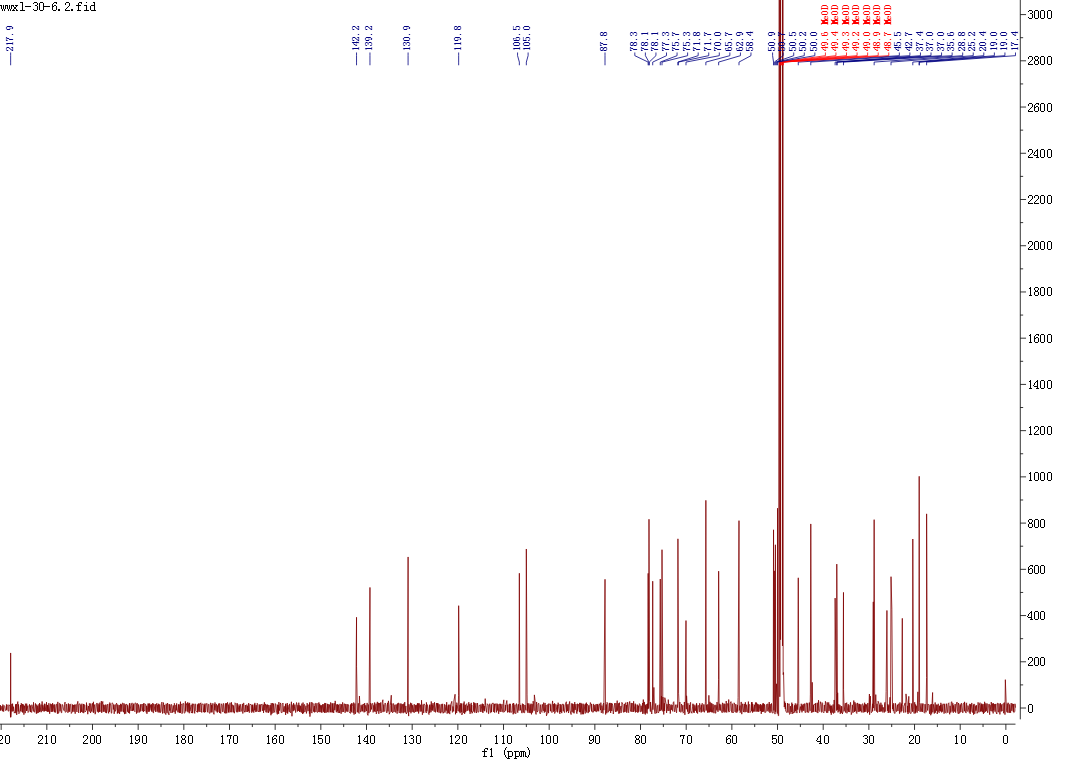


**Fig. S55** DEPT 90° spectrum **(**MeOH-*d4***)** of hemslepenside O (**6**)


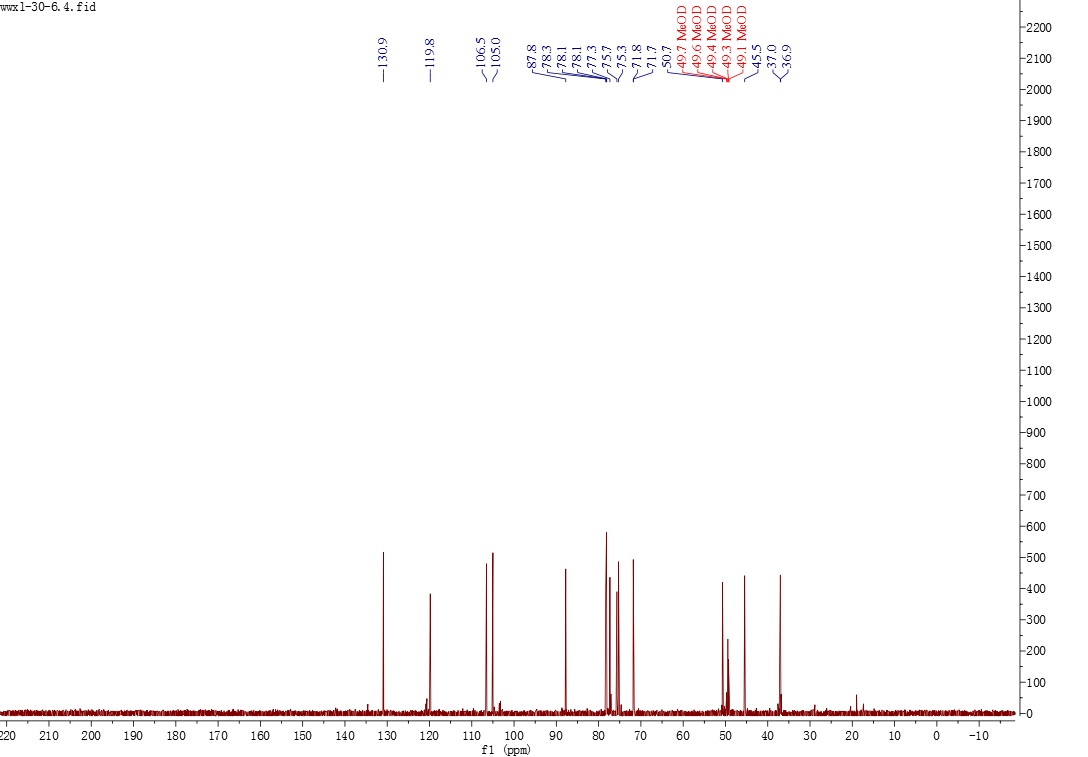


**Fig. S56** DEPT 135° spectrum **(**MeOH-*d4***)** of hemslepenside O (**6**)


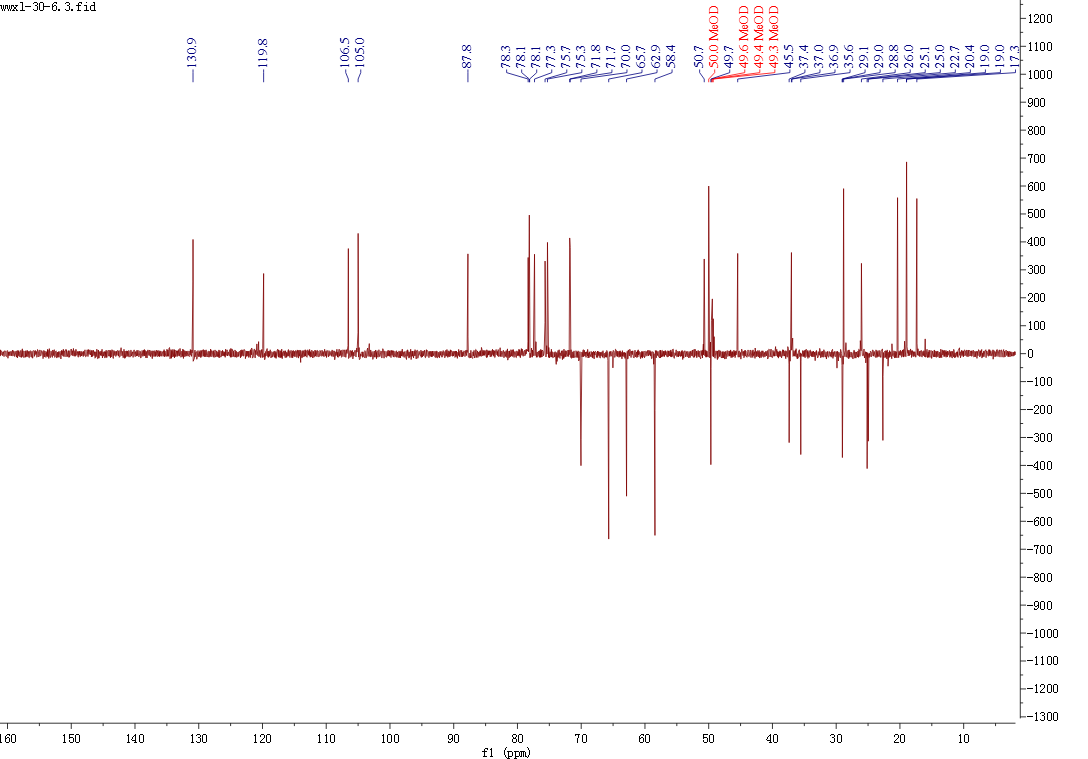


**Fig. S57** HSQC spectrum (MeOH-*d4*) of hemslepenside O (**6**)


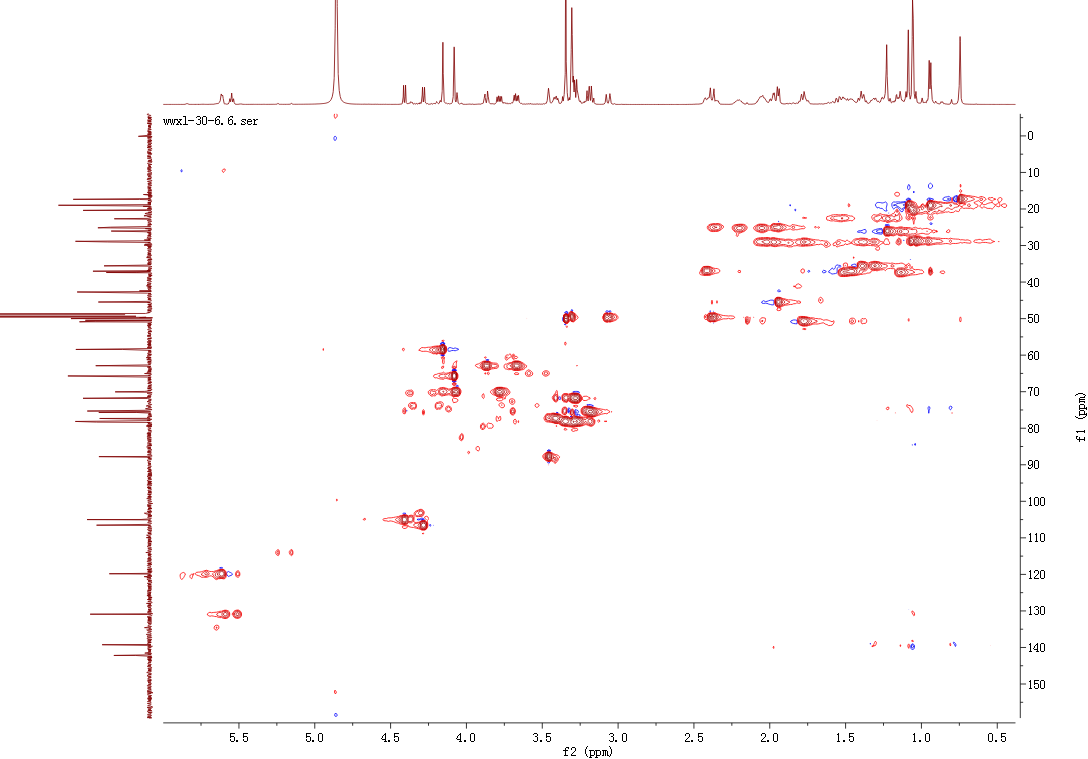


**Fig. S58** HMBC spectrum (MeOH-*d4*) of hemslepenside O (**6**)


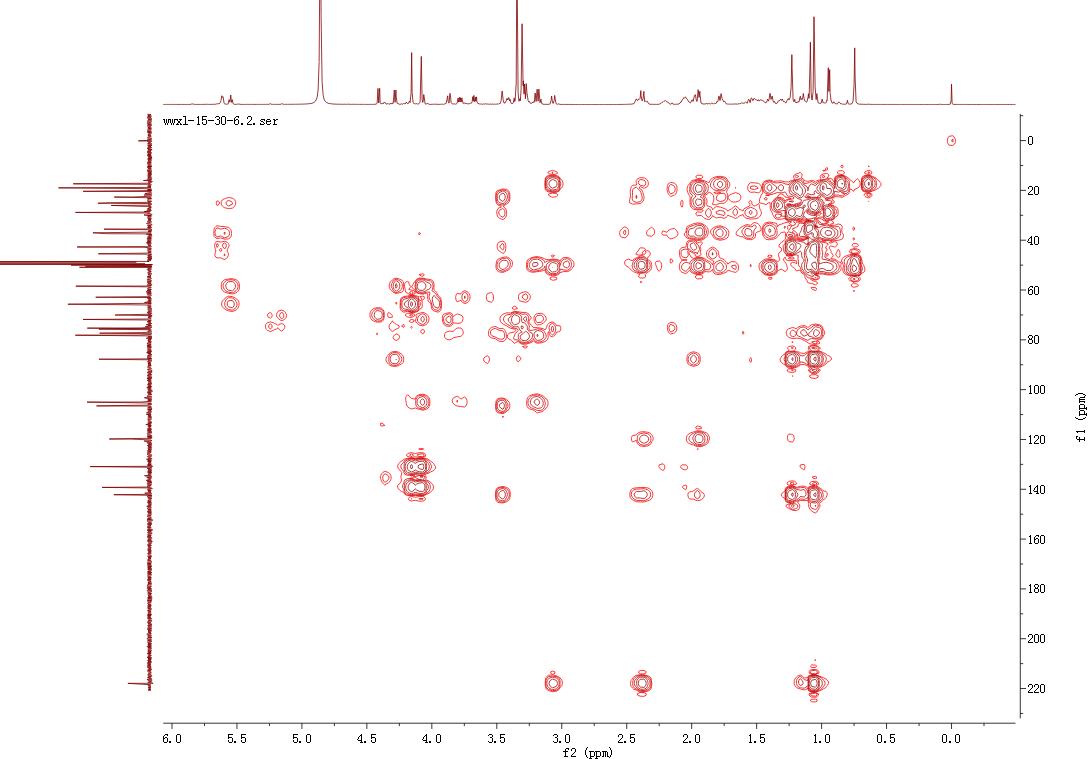


**Fig. S59** 1H-1H COSY spectrum (MeOH-*d4*) of hemslepenside O (**6**)


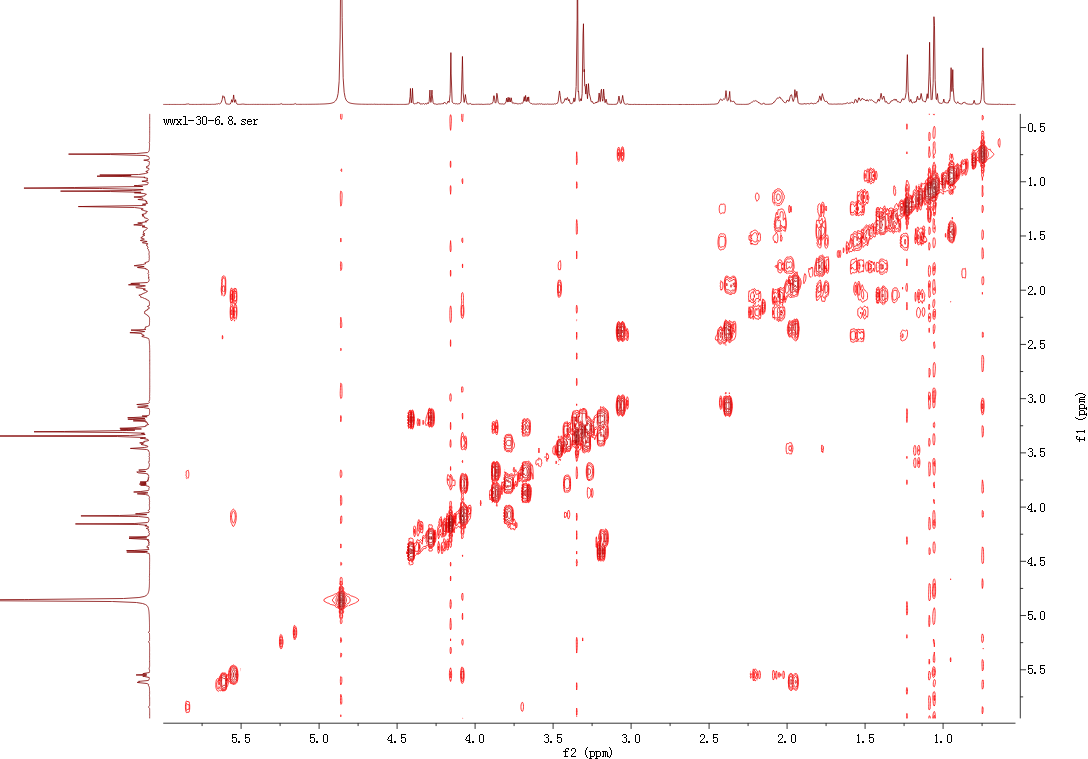


**Fig. S60** NOESY spectrum (MeOH-*d4*) of hemslepenside O (**6**)


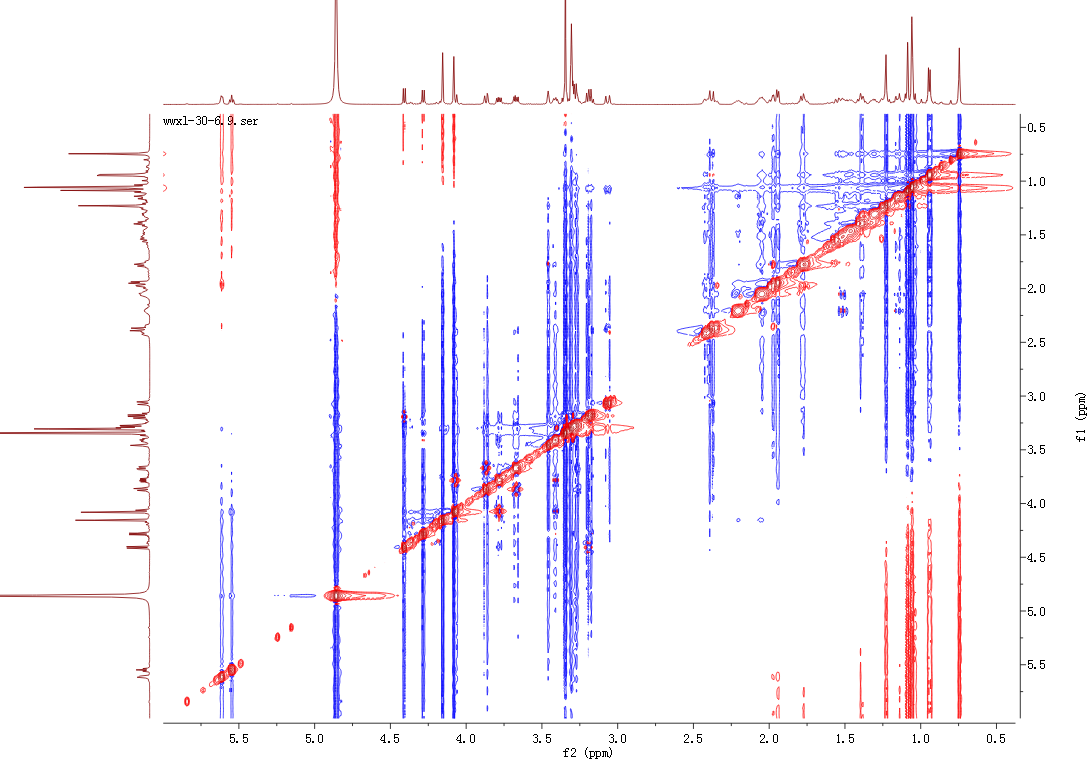


**Fig. S61** HRESIMS of hemslepenside P (**7**)


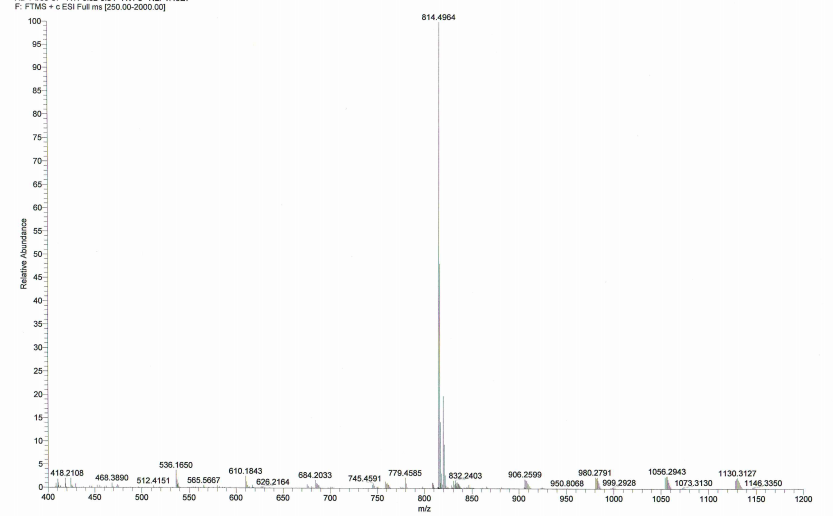


**Fig. S62** IR spectrum (KBr) of hemslepenside P (**7**)

**Fig. S63** 1H NMR spectrum (MeOH-*d4*, 600 MHz) of hemslepenside P (**7**)


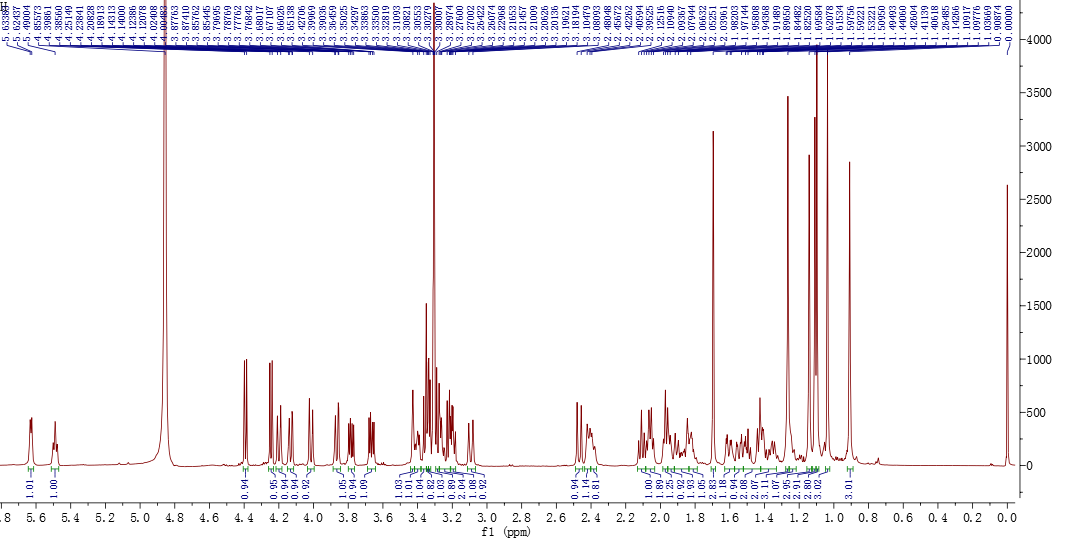


**Fig. S64** 13C NMR spectrum (MeOH-*d4*, 150 MHz) of hemslepenside P (**7**)


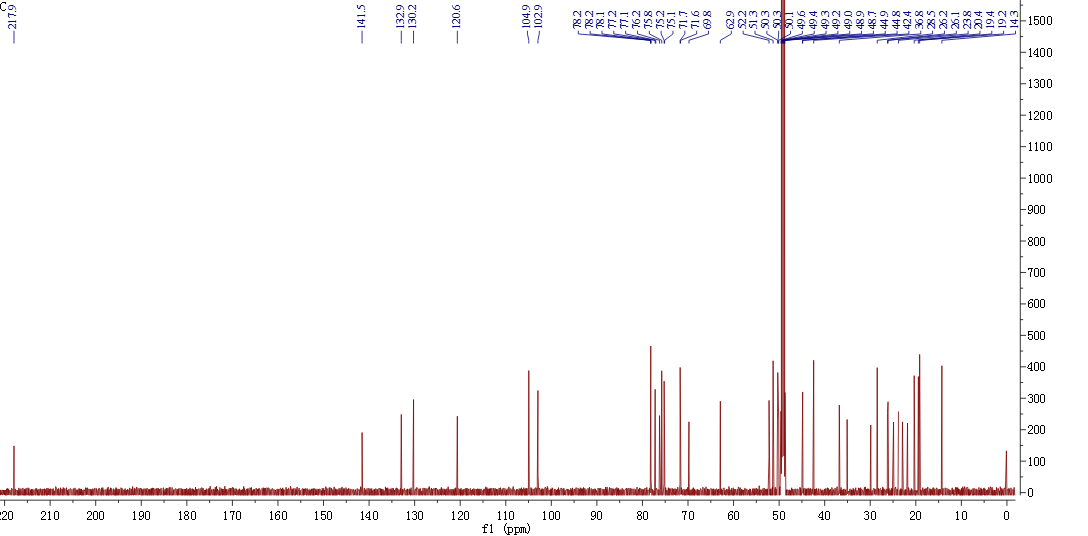


**Fig. S65** DEPT 90° spectrum **(**MeOH-*d4***)** of hemslepenside P (**7**)


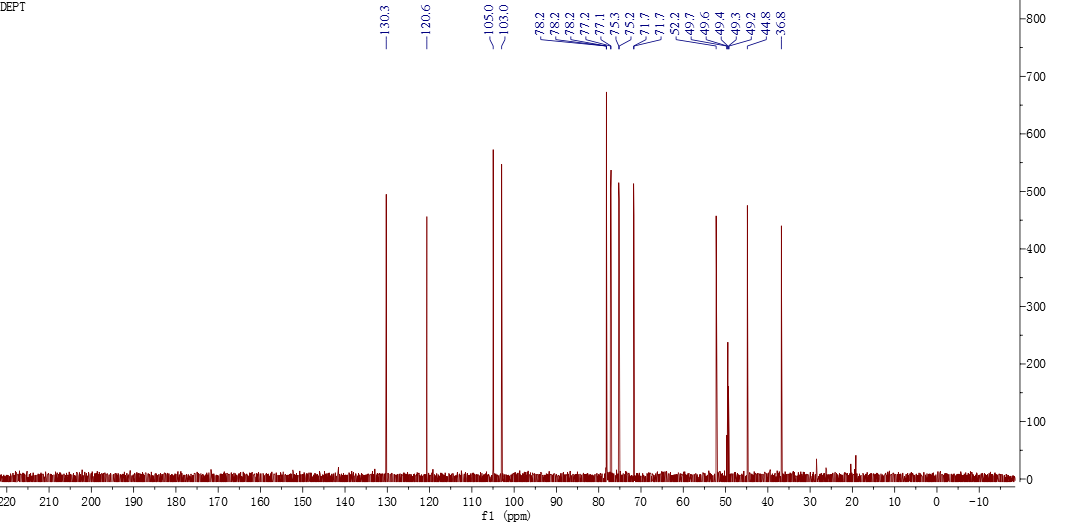


**Fig. S66** DEPT 135° spectrum **(**MeOH-*d4***)** of hemslepenside P (**7**)


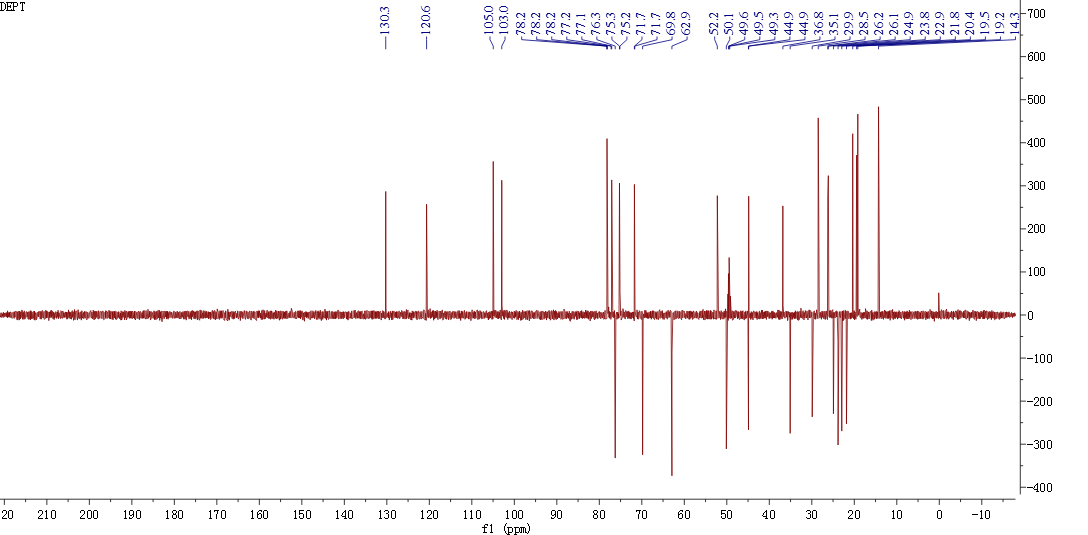


**Fig. S67** HSQC spectrum (MeOH-*d4*) of hemslepenside P (**7**)


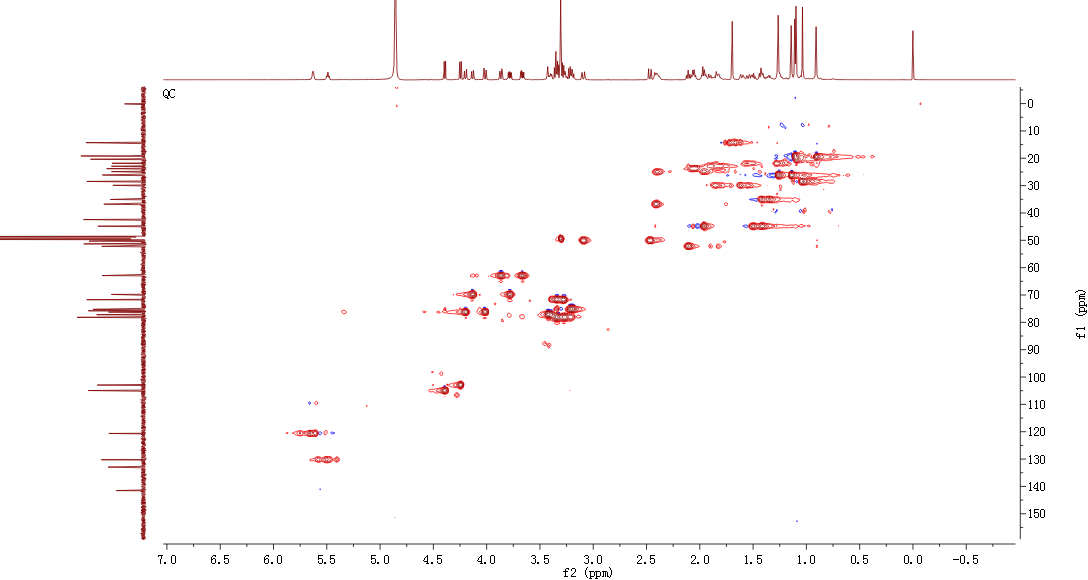


**Fig. S68** HMBC spectrum (MeOH-*d4*) of hemslepenside P (**7**)


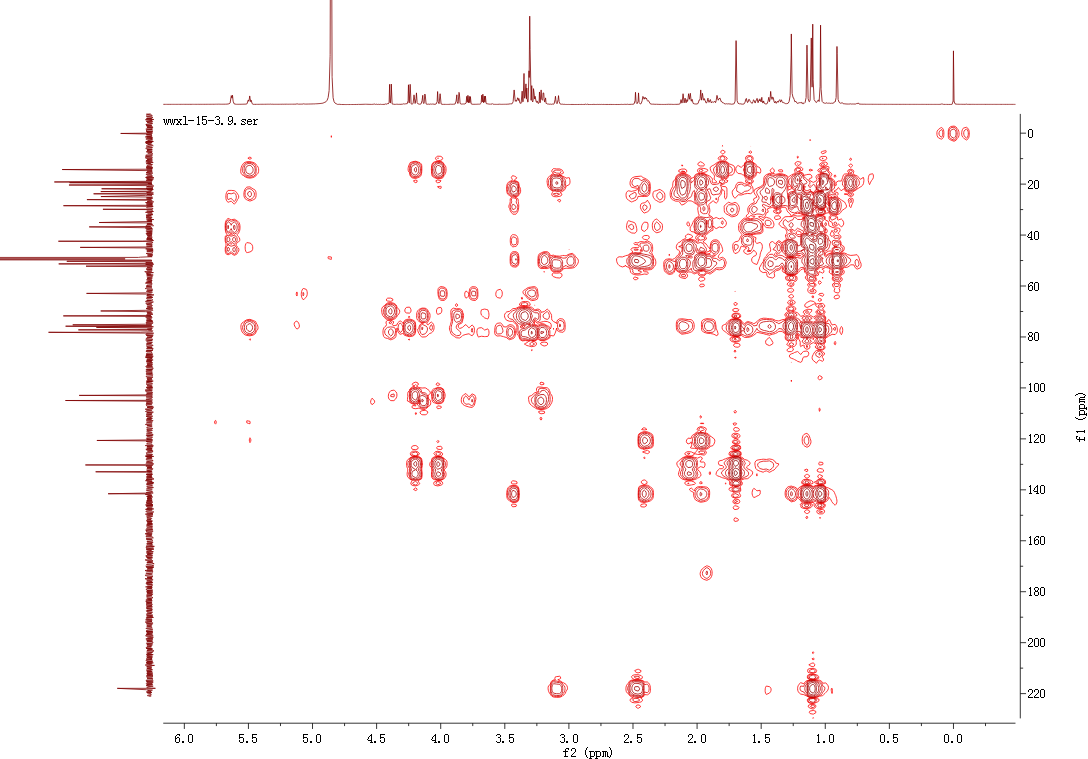


**Fig. S69** 1H-1H COSY spectrum (MeOH-*d4*) of hemslepenside P (**7**)


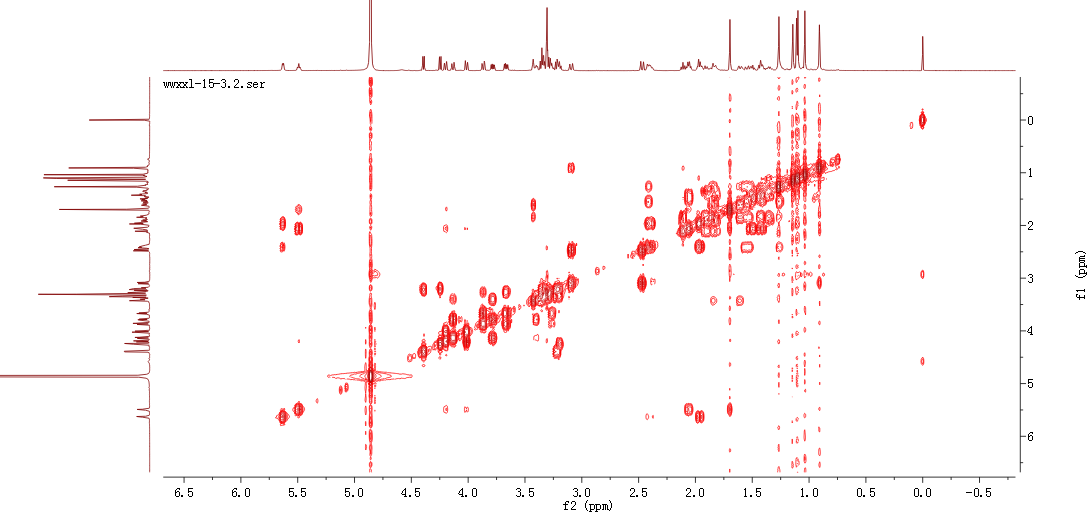


**Fig. S70** NOESY spectrum (MeOH-*d4*) of hemslepenside P (**7**)


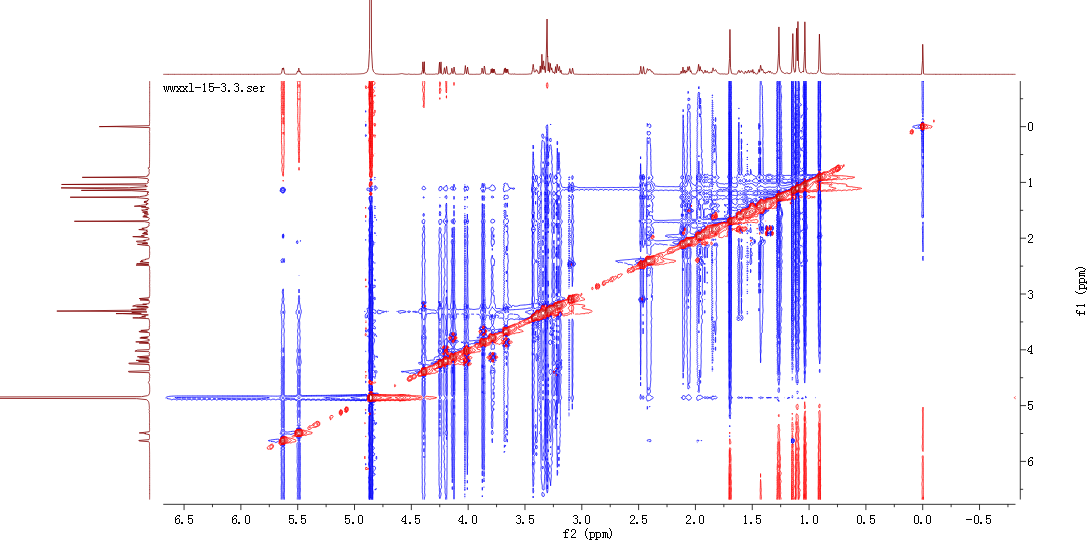


**Fig. S71** HPLC spectrogram of the composition sugar’ derivatives

1. Glc reference substance:

1. Glc reference substance:

Hybrid reference substance:

Sugar derivatives of hemslepenside J (**1**):

Sugar derivatives of hemslepenside K (**2**):

Sugar derivatives of hemslepenside L (**3**):

Sugar derivatives of hemslepenside M (**4**):

Sugar derivatives of hemslepenside N (**5**):

Sugar derivatives of hemslepenside O (**6**):

Sugar derivatives of hemslepenside P (**7**):

**Table S1** The IC50 values of compounds **1**-**9** against HT29 cell line

| Compound code | HT29 cell line |
| --- | --- |
| **1** | >100 |
| **2** | 17.711 ± 0.95 |
| **3** | >100 |
| **4** | >100 |
| **5** | >100 |
| **6** | >100 |
| **7** | >100 |
| **8** | 0.69 ± 0.06 |
| **9** | 0.37 ± 0.025 |
| *Cisplatin* | 4.87 ± 0.38 |

**Table S2** Cell cycle data of compound **8**

|  | Negative control | | | Solvent control | | | 0.1 μM | | | 1 μM | | |
| --- | --- | --- | --- | --- | --- | --- | --- | --- | --- | --- | --- | --- |
| Sub-G1 | 1.33 | 4.04 | 3.27 | 3.16 | 3.24 | 1.81 | 2.78 | 1.77 | 2.45 | 4.69 | 4.45 | 3.94 |
| G0/G1 | 57.50 | 62.30 | 60.70 | 63.40 | 62.90 | 53.90 | 60.20 | 61.30 | 57.20 | 51.90 | 53.30 | 52.60 |
| S | 36.60 | 31.50 | 31.30 | 29.60 | 28.20 | 40.40 | 31.00 | 28.70 | 32.80 | 29.40 | 28.00 | 28.20 |
| G2/M | 3.71 | 4.94 | 3.59 | 3.07 | 4.24 | 4.66 | 4.50 | 7.39 | 6.23 | 11.80 | 13.60 | 13.90 |

**Table S3** Cell cycle data of compound **9**

|  | Negative control | | | Solvent control | | | 0.1 μM | | | 1 μM | | |
| --- | --- | --- | --- | --- | --- | --- | --- | --- | --- | --- | --- | --- |
| Sub-G1 | 1.33 | 4.04 | 3.27 | 3.16 | 3.24 | 1.81 | 2.68 | 3.37 | 2.60 | 2.94 | 0.55 | 2.28 |
| G0/G1 | 57.50 | 62.30 | 60.70 | 63.40 | 62.90 | 53.90 | 60.90 | 61.60 | 59.60 | 58.70 | 65.20 | 63.40 |
| S | 36.60 | 31.50 | 31.30 | 29.60 | 28.20 | 40.40 | 29.70 | 26.40 | 29.30 | 25.40 | 21.20 | 20.50 |
| G2/M | 3.71 | 4.94 | 3.59 | 3.07 | 4.24 | 4.66 | 5.51 | 5.42 | 6.40 | 11.60 | 14.50 | 14.30 |

**Table S4** Cell apoptosis data of compound **8**

|  | Negative control | | | Solvent control | | | 0.1 μM | | | 1 μM | | |
| --- | --- | --- | --- | --- | --- | --- | --- | --- | --- | --- | --- | --- |
| live cells | 84.10 | 85.90 | 86.00 | 88.10 | 87.00 | 81.30 | 69.70 | 69.60 | 67.40 | 63.30 | 62.70 | 62.80 |
| early apoptotic cells | 4.92 | 5.03 | 4.91 | 4.03 | 4.64 | 5.90 | 20.40 | 19.70 | 22.00 | 22.80 | 22.90 | 22.40 |
| late apoptotic/secondary necrotic cells | 11.00 | 8.94 | 8.98 | 7.80 | 8.21 | 12.80 | 9.84 | 10.70 | 10.60 | 13.80 | 14.20 | 14.60 |
| damaged cells | 0.01 | 0.09 | 0.11 | 0.08 | 0.14 | 0.04 | 0.08 | 0.04 | 0.03 | 0.08 | 0.11 | 0.18 |

**Table S5** Cell apoptosis data of compound **9**

|  | Negative control | | | Solvent control | | | 0.1 μM | | | 1 μM | | |
| --- | --- | --- | --- | --- | --- | --- | --- | --- | --- | --- | --- | --- |
| live cells | 84.10 | 85.90 | 86.00 | 88.10 | 87.00 | 81.30 | 67.80 | 69.50 | 68.30 | 44.40 | 47.10 | 47.10 |
| early apoptotic cells | 4.92 | 5.03 | 4.91 | 4.03 | 4.64 | 5.90 | 10.10 | 7.78 | 9.66 | 32.40 | 28.60 | 29.00 |
| late apoptotic/secondary necrotic cells | 11.00 | 8.94 | 8.98 | 7.80 | 8.21 | 12.80 | 22.00 | 22.40 | 21.90 | 23.10 | 24.00 | 23.70 |
| damaged cells | 0.01 | 0.09 | 0.11 | 0.08 | 0.14 | 0.04 | 0.09 | 0.32 | 0.09 | 0.09 | 0.20 | 0.13 |
